1 **MCPH1 inhibits condensin II during interphase by regulating its SMC2-kleisin**  
2 **interface**

3  
4 Martin Houliard<sup>†1</sup>, Erin E. Cutts<sup>†2</sup>, Muhammad S. Shamim<sup>3,4,5</sup>, Jonathan Godwin<sup>1</sup>,  
5 David Weisz<sup>3,5</sup>, Aviva Presser Aiden<sup>3,5</sup>, Erez Lieberman Aiden<sup>3,5</sup>, Lothar  
6 Schermelleh<sup>1</sup>, Alessandro Vannini<sup>2,6\*</sup>, Kim Nasmyth<sup>1\*</sup>

7  
8 †These authors contributed equally.

9 1. Department of Biochemistry, University of Oxford, United Kingdom

10 2. Division of Structural Biology, The Institute of Cancer Research, London, United  
11 Kingdom.

12 3. The Center for Genome Architecture, Department of Molecular and Human  
13 Genetics, Baylor College of Medicine, Houston, TX 77030

14 4. Medical Scientist Training Program, Baylor College of Medicine, Houston, TX  
15 77030, USA. 4 Department of Bioengineering, Rice University, Houston, TX 77030,  
16 USA.

17 5. Center for Theoretical Biological Physics, Rice University, Houston, TX 77005,  
18 USA.

19 6. Fondazione Human Technopole, Structural Biology Research Centre, Milan, Italy

20  
21 \*To whom correspondence should be addressed: [ashley.nasmyth@bioch.ox.ac.uk](mailto:ashley.nasmyth@bioch.ox.ac.uk)  
22 and [alessandro.vannini@fht.org](mailto:alessandro.vannini@fht.org)

23  
24

25 **ABSTRACT:**

26

27 The dramatic change in morphology of chromosomal DNAs between interphase and  
28 mitosis is one of the defining features of the eukaryotic cell cycle. Two types of  
29 enzymes, namely cohesin and condensin confer the topology of chromosomal DNA  
30 by extruding DNA loops. While condensin normally configures chromosomes  
31 exclusively during mitosis, cohesin does so during interphase. The processivity of  
32 cohesin's LE during interphase is limited by a regulatory factor called WAPL, which  
33 induces cohesin to dissociate from chromosomes via a mechanism that requires  
34 dissociation of its kleisin from the neck of SMC3. We show here that a related  
35 mechanism may be responsible for blocking condensin II from acting during  
36 interphase. Cells from patients carrying mutations in the *Mcp1* gene undergo  
37 premature chromosome condensation but it has never been established for certain  
38 whether MCPH1 regulates condensin II directly. We show that deletion of *Mcp1* in  
39 mouse embryonic stem cells unleashes an activity of condensin II that triggers  
40 formation of compact chromosomes in G1 and G2 phases, which is accompanied by  
41 enhanced mixing of A and B chromatin compartments, and that this occurs even in  
42 the absence of CDK1 activity. Crucially, inhibition of condensin II by MCPH1 depends  
43 on the binding of a short linear motif within MCPH1 to condensin II's NCAPG2 subunit.  
44 We show that the activities of both Cohesin and Condensin II may be restricted during  
45 interphase by similar types of mechanisms as MCPH1's ability to block condensin II's  
46 association with chromatin is abrogated by the fusion of SMC2 with NCAPH2.  
47 Remarkably, in the absence of both WAPL and MCPH1, cohesin and condensin II  
48 transform chromosomal DNAs of G2 cells into chromosomes with a solenoidal axis  
49 showing that both SMC complexes must be tightly regulated to adjust both the  
50 chromatid's structure and their segregation.

51

52

## 53 INTRODUCTION

54

55 The segregation of sister DNAs during mitosis requires that they are first disentangled  
56 and organised into individual sister chromatids before being pulled in opposite  
57 directions by the mitotic spindle upon the dissolution of sister chromatid cohesion by  
58 separate. Chromatid formation during mitosis and sister chromatid cohesion  
59 necessary for bi-orientation are mediated by highly related structural maintenance of  
60 chromosomes (SMC)-kleisin complexes, namely condensin and cohesin respectively.  
61 In both cases, the activity of their ring-like SMC-kleisin trimers is regulated by large  
62 hook-shaped proteins composed of tandem HEAT repeats, known as HAWKs (HEAT  
63 repeat proteins associated with kleisins) <sup>1</sup>.

64 The conundrum that complexes with such similar geometries appear to perform  
65 such dissimilar functions has been resolved by the realisation that cohesin also  
66 organises DNAs into chromatid-like structures, albeit during interphase and only upon  
67 ablation of a regulatory protein called WAPL <sup>2</sup> as well as naturally during meiotic  
68 prophase <sup>3</sup> or during V(D)J recombination when WAPL is downregulated in pro-B cells  
69 <sup>4</sup>. There is now considerable evidence that cohesin and condensin organise  
70 chromosomal DNAs during interphase and mitosis, respectively, by extruding DNA  
71 loops in a processive manner. Indeed, both exhibit such loop extrusion (LE) activity *in*  
72 *vitro* <sup>5,6</sup>. LE mediated by cohesin is halted or at least retarded at specific sequences  
73 bound by CTCF, and the processivity of the complex is reduced by WAPL which  
74 induces cohesin's dissociation from chromatin, albeit only infrequently every 10-20  
75 min <sup>7-9</sup>. No such site-specific DNA binding proteins are known to regulate condensin.  
76 In both cases, chromatid formation is envisaged to arise from processive LE activity,

77 which organises DNA into a series of loops, each emanating from a central core  
78 containing the SMC-kleisin loop extruders <sup>1</sup>.

79 Mammalian cells possess two types of condensin complexes: condensin I and  
80 II. Both complexes share the same SMC proteins, SMC2 and SMC4, which both  
81 contain 50 nm long anti-parallel coiled coils connecting a hinge domain at one end  
82 with an ATPase domain, formed from the N- and C-terminal extremities, at the other.  
83 Dimerisation via their hinges creates V-shaped SMC2/4 heterodimers whose ATPase  
84 heads are inter-connected by their kleisin subunits, NCAPH1 for condensin I and  
85 NCAPH2 for condensin II. These in turn recruit different HAWK regulatory subunits,  
86 NCAPD2 or D3 and NCAPG or G2 for condensin I and II respectively <sup>10</sup>. While  
87 condensin II remains in the nucleus during interphase and starts to organise  
88 chromosomal DNAs during prophase, condensin I only has access to the DNA after  
89 nuclear envelope break down <sup>11-13</sup>. Despite this difference, both accumulate along the  
90 longitudinal axes of metaphase chromosomes <sup>13,14</sup>. HiC data suggest that condensin  
91 I extrudes shorter loops that are nested within longer ones previously created by  
92 condensin II. Interactions between distant loops suggest that the loops created by  
93 condensin II may be organised radially around a coiled or solenoidal axis <sup>15</sup>. The ratio  
94 between condensin I and condensin II adjusts the coiling of chromosome axes, partly  
95 by altering the width of the central spiral and generating curled chromosomes <sup>16</sup>.

96 An important factor in limiting the processivity of loop extrusion by cohesin is its  
97 release from chromatin. This process that depends on WAPL involves engagement of  
98 cohesin's ATPase heads <sup>17</sup> and dissociation of the N-terminal domain (NTD) of its  
99 SCC1 kleisin subunit from the coiled coil (neck) that emerges from SMC3's ATPase  
100 head domain <sup>18</sup>. Because a co-translational fusion of SCC1's NTD to the C-terminal  
101 domain of SMC3's ATPase blocks release, it has been proposed that it involves

102 passage of DNAs previously entrapped inside its SMC-kleisin ring through an exit gate  
103 created by dissociation of SCC1 from SMC3<sup>19,20</sup>. Indeed, the kleisin NTDs appear to  
104 dissociate *in vitro* from engaged SMC2 and SMC4 heads<sup>21,22</sup> as well as those of  
105 SMC1 and SMC3<sup>19,23,24</sup>. This observation raises the possibility that release via a  
106 kleisin-SMC exit gate might be a feature of chromosomal condensin complexes as  
107 well as cohesin. However, whether release of this nature occurs *in vivo* and whether  
108 it has an important function is not known.

109 Condensin II's activity and functions within the nuclei of interphase cells are  
110 poorly understood. While some studies have reported that it binds to chromatin during  
111 interphase<sup>25</sup>, its depletion from post mitotic mouse liver cells has little or no effect on  
112 genome organisation or transcription<sup>26</sup>. Likewise, the notion that condensin II is  
113 activated as cells enter mitosis via kinase cascade involving CDK1 and PLK1<sup>27</sup> also  
114 begs the question as to whether it has any significant role during interphase. However,  
115 an important clue that condensin II can in principle function during this stage of the cell  
116 cycle comes from the characterization of patients carrying a mutation of the *Mcp1*  
117 gene, which causes a reduction in the size of the cerebral cortex known as primary  
118 microcephaly (OMIM 608585)<sup>28,29</sup>. Cells from such patients have an increased  
119 number of prophase-like cells<sup>30,31</sup>. The prophase-like organisation of chromosomal  
120 DNA has since been shown to be mediated by condensin II<sup>32,33</sup>, whose abnormal  
121 activity triggers premature condensation in G2 and late de-condensation in G1<sup>30,31,34</sup>.

122 MCPH1 is only found in metazoa. It contains three BRCT domains, one N-  
123 terminal and two C-terminal, separated by a disordered region. The diverse  
124 phenotypes of mutant cells have led to many different and often conflicting  
125 suggestions for its roles. Binding of MCPH1's C-terminal BRCT domains to  
126 phosphorylated histone H2AX<sup>36</sup> is thought to play a part in the DNA damage

127 response, while the premature chromosome condensation caused by mutations within  
128 its N-terminal BRCT has been attributed to this domain's defective association with  
129 the SWI/SNF nucleosome remodelling complex and SET1<sup>37</sup>. MCPH1 is also thought  
130 to bind DNA and has been proposed to function in telomere maintenance, centriole  
131 organisation and CHK1 activation<sup>38-42</sup>. In contradiction to the finding that MCPH1  
132 binds directly to condensin II, it is widely believed that the N-terminal ~200 residues of  
133 MCPH1 compete with condensin II for chromosomal binding<sup>33</sup>, in other words,  
134 MCPH1 has been proposed to occupy loci required for condensin II's chromosomal  
135 activity.

136         Given the diversity and conflicting views of MCPH1's function, we have re-  
137 addressed its role in regulating chromosome structure by analysing the consequences  
138 of deleting its gene in mouse ES cells. We show that loss of MCPH1 induces a  
139 prophase-like organisation of chromatin during G1 and G2 but not during S phase,  
140 and that this depends on condensin II. Crucially, this phenotype, which is  
141 accompanied by condensin II's stable association with chromosomes, is unaffected  
142 by inhibiting CDK1, suggesting that MCPH1 does not inhibit chromosome  
143 condensation merely by delaying the CDK1 activation normally necessary for  
144 condensin II activity as previously suggested<sup>40,41,43</sup>. We demonstrate that MCPH1  
145 instead regulates the organisation of chromosomal DNA through the binding of  
146 condensin II's NCAPG2 subunit by a conserved short linear motif (SLiM) situated  
147 within its central domain. Such binding does not *per se* explain how MCPH1 regulates  
148 condensin II and has little or no effect on its ATPase activity, at least *in vitro*.  
149 Presumably, other domains, for example its N-terminal BRCT, which is frequently  
150 mutated in human microcephaly patients, have an effector function, by interacting with  
151 other sites within the condensin II pentamer or recruit other cellular factors.

152 A clue to the role of MCPH1 is the resemblance between the stable association of  
153 condensin II with chromosomal DNA induced by MCPH1 ablation with the effect on  
154 cohesin of mutating *Wapl*, which binds to the cohesin HAWK equivalent to NCAPG2,  
155 namely STAG2, also using an FY SLiM. We therefore tested whether like WAPL,  
156 MCPH1 prevents condensin II from associating stably with DNA by opening the  
157 interface between NCAPH2's NTD with the neck of SMC2's ATPase domain.  
158 Remarkably, a translational fusion between SMC2's C-terminus and NCAPH2's N-  
159 terminus is not only functional in mouse oocytes but also resistant to the inhibition  
160 mediated by an excess of MCPH1 induced by mRNA micro-injection. This raises the  
161 possibility that like WAPL, MCPH1 acts by opening the interface between the kleisin's  
162 NTD and the neck of the SMC ATPase domain. Finally, we investigated the  
163 consequences of inducing the stable association with G2 chromosomes of both  
164 cohesin and condensin and found that the chromosomal axes created by cohesin upon  
165 mutating *Wapl* are turned into solenoids in cells deleted for both *Wapl* and *Mcp1*.

166

## 167 **RESULTS**

168

### 169 ***Mcp1* deletion induces chromosome condensation during interphase in** 170 **embryonic stem cells.**

171 Premature chromosome condensation is a key feature of cells isolated from patients  
172 carrying *Mcp1* mutations. To study this in greater detail, we used CRISPR/Cas9 to  
173 delete *Mcp1* in mouse E14 embryonic stem cells in which we had previously  
174 introduced a Halo-tag at the C-terminal end of NCAPH2 (NCAPH2-Halo) at its  
175 endogenous locus. Western blot using an anti-NCAPH2 antibody confirmed that all  
176 the NCAPH2 protein present in the cell is shifted to a higher molecular weight that

177 matches the size of the band detected by in-gel Halo-TMR fluorescence. The protein  
178 expression levels are identical to the untagged protein in control cells (Figure 1A).  
179 Deleting the second exon of *Mcph1* induces a frameshift between exon 1 and 3 and  
180 thereby complete inactivation of the gene. Western blot analysis of the targeted cells  
181 confirmed the lack of any MCPH1 protein (Figure 1A).

182 Immunofluorescence microscopy revealed that *Mcph1* deletion leads to a  
183 substantial increase in the fraction of cells with prophase like chromosomes (Figure  
184 1B). FACS analysis of cells stained with propidium iodide to measure DNA content,  
185 H3PS10 specific antibodies to detect G2/M cells, and pulse labelled with EdU to  
186 identify S phase cells showed no overall change in cell cycle progression  
187 (Supplementary figure 1). Thus, *Mcph1* deletion caused little or no prophase arrest.  
188 Crucially, all EdU negative cells, whether they were in G1 (H3PS10 negative) or G2  
189 (H3PS10 positive), contained prophase-like chromosomes (>100 cells counted) while  
190 few if any of the EdU positive S phase cells did so (Figure 1C and 3D). In wild type G1  
191 and G2 cells, different centromeres and peri-centric regions cluster in chromocenters.  
192 This feature is abolished in the mutant cells, where every centromere occupies an  
193 individual location (Supplementary figure 2) and each chromosome is likewise  
194 individualised into prophase-like chromatids (Figure 1B). The localisation of NCAPH2  
195 was analysed by labelling its Halo-tag with the fluorescent TMR ligand. In wild type,  
196 NCAPH2 has a diffuse nuclear distribution throughout most of the interphase, with no  
197 enrichment at any particular site. The protein starts to accumulate at centromeres  
198 during G2 and subsequently along the length of chromosomes from prophase until the  
199 end of telophase. Deletion of *Mcph1* caused NCAPH2 to associate with the prophase-  
200 like chromosomes in all G1 and G2 cells and become enriched at their individualised  
201 centromeres (Figure 1B).



202

203 **MCPH1 restricts condensin II activity during G1 and G2.**

204 The change in chromosome organisation caused by deletion of *McpH1* is  
205 accompanied by a change in the localisation of condensin II. To address whether  
206 condensin II is causing the observed phenotype, we used a Halo-PROTAC ligand to  
207 specifically induce degradation of NCAPH2-Halo (Figure 1D). Because this completely  
208 reversed the re-organisation of chromosomal DNA caused by *McpH1* deletion (Figure  
209 1E), we conclude that altered regulation of condensin II is largely if not completely  
210 responsible. Unlike the centromere dispersion, chromosome condensation, and  
211 chromosome unpairing induced by loss of Slimb ubiquitin ligase or casein kinase 1 in  
212 *Drosophila* cells, which is accompanied and caused by an increase in the level of  
213 NCAPH2<sup>44,45</sup>, deletion of *McpH1* in ES cells is accompanied by a modest but  
214 nevertheless significant reduction in NCAPH2 levels (Figure 1 A & D). The implication  
215 is that MCPH1 restricts the activity of individual condensin II complexes in G1 and G2  
216 cells.

217

218 **MCPH1 prevents condensin II's stable association with interphase chromatin.**

219 Photobleaching studies with GFP tagged condensin II subunits has revealed that they  
220 are highly mobile during interphase, suggesting that they are rarely or only transiently  
221 associated with chromatin fibres<sup>8</sup>. FRAP of TMR labelled NCAPH2-Halo confirmed  
222 this as photobleached spots of Halo-TMR fluorescence recovered 95% of their  
223 fluorescence within 1 min (Figure 2). However, deletion of *McpH1* caused a dramatic  
224 change in the dynamics, with fluorescence merely recovering to 28% of its starting  
225 level within 1 minute. After that, no further change occurred during the next 10 min  
226 (Figure 2), implying that *McpH1* deletion causes 72% of condensin II complexes to

227 associate stably with chromatin in G1 or G2 cells, thereby altering chromatin  
228 compaction during interphase.

229

230 **The chromosome re-organisation induced by *Mcph1* deletion does not depend**  
231 **on CDK1.**

232 To check whether the premature formation of prophase-like chromatids when *Mcph1*  
233 deleted cells enter G2 might be caused by the precocious activation of CDK1, which  
234 activates condensin II as wild type cells enter prophase, we compared inhibitory  
235 phosphorylation of CDK1's Y15 residue and cyclin B1 localisation in wild type and  
236 mutant cells. Deletion of *Mcph1* neither reduced Y15 phosphorylation nor caused  
237 cyclin B1 to enter nuclei prematurely (Figure 3A and B). To address this issue more  
238 directly, namely whether CDK1 activity is required for condensin II's hyperactivity, we  
239 asked whether inhibition of the kinase would suppress the chromosomal re-  
240 organisation. Treatment of both wild type and *Mcph1* deleted cultures with the CDK1  
241 inhibitor RO-3306 for seven hours caused most cells to accumulate in G2 with a 4C  
242 DNA content (Figure 3C). The DNA organisation of wild type cells resembled that of  
243 normal G2 cells, namely no chromatid-like structures were formed and centromeres  
244 were clustered in chromocenters (Figure 3D). In contrast, the chromosomal DNAs of  
245 all mutant cells were organized into prophase-like chromatids with individualised  
246 centromeres (Figure 3D). We conclude that the hyperactivity of condensin II in G2  
247 *Mcph1* deleted cells is independent of CDK1, suggesting that MCPH1 regulates  
248 condensin II directly.

249

250 ***Mcph1* deletion induces chromosomal compaction and alters inter-**  
251 **chromosomal interactions**

252 *In situ* Hi-C libraries were generated for wild-type mouse E14 and *McpH1* deleted cells.  
253 In wild-type cells, chromosomal p-termini have enhanced contact frequencies with one  
254 another, as do q-termini. In contrast, p-termini are less likely to contact q-termini  
255 (Figure 4A). This is consistent with the presence of chromocenters within which p-  
256 termini co-localize with each other and likewise q-termini with each other. Because  
257 mouse chromosomes are telocentric, with centromeres located at their p-termini, the  
258 HiC maps confirm that centromeres co-localize with one another as do telomeres.

259 Strikingly, the enhanced spatial proximity between chromosomal p-termini  
260 (resp., q-termini) is lost in the absence of MCPH1 (Figure 4B and C), consistent with  
261 the disappearance of chromocenters as observed by microscopy. Deletion of *McpH1*  
262 also results in an enhancement in the frequency of long-range, intra-chromosomal  
263 contacts (Figure 4D, E and F) and enhances the frequency of inter-compartment (A to  
264 B) contacts as compared to intra-compartment contacts (A to A and B to B)  
265 (Supplementary figure 3A and B). This finding is consistent with the compaction of  
266 individual chromosomes upon loss of MCPH1.

267 The HiC maps did not reveal loci moving from one compartment to the other  
268 nor any major changes in loops or contact domains (Supplementary figure 3C).

269

## 270 **Recombinant MCPH1 forms a stable complex with condensin II.**

271 Our results suggest that MCPH1 directly represses condensin II activity, possibly via  
272 a direct interaction. Previous *in vitro* work suggested that MCPH1 binds condensin II  
273 via two interfaces. One interface between the N-terminal 195 residues of MCPH1 and  
274 NCAPD3 and a second binding site between a highly conserved central domain of  
275 MCPH1 (381-435) and NCAPG2 (Figure 5A and B)<sup>33</sup>. To confirm a direct interaction  
276 between MCPH1 and condensin II, full length human MCPH1 and condensin II were

277 expressed in insect cells and separately purified. While full-length MCPH1 was largely  
278 insoluble, we purified sufficient strep-tagged full-length MCPH1 to confirm that it could  
279 pull-down pentameric condensin II complex (Figure 5C). To localise the binding site,  
280 we expressed and purified N-terminal His-MBP-tagged truncations of MCPH1 in *E.*  
281 *coli*: MBP-MCPH1<sub>1-435</sub>, MBP-MCPH1<sub>1-195</sub>, MBP-MCPH1<sub>196-435</sub> and MBP-MCPH1<sub>348-469</sub>  
282 (Figure 5A). We found that strep-tagged condensin II could only pull-down MCPH1  
283 constructs that included the central domain (Figure 5D). MCPH1 binding was specific  
284 to condensin II, as condensin I-strep was unable to pull down any MCPH1 constructs  
285 (Supplementary figure 4A).

286 We then tested whether tetrameric condensin II, lacking either NCAPD3 or  
287 NCAPG2, could bind MCPH1<sub>1-435</sub> using pull-down assays. To exclude the MBP tag  
288 interfering with the interaction at the N-terminus of MCPH1, we moved the tag to the  
289 C-terminus. We found that removing NCAPG2 greatly reduced MCPH1<sub>1-435</sub> MBP pull-  
290 down, while removing NCAPD3 had no effect (Figure 5E), suggesting that the binding  
291 was mediated by the central domain of MCPH1 to NCAPG2. Further analysis with  
292 analytical size exclusion chromatography demonstrated that MBP-MCPH1<sub>196-435</sub> and  
293 condensin II co-eluted in one peak, separated from the void volume, suggesting they  
294 form a stable, soluble complex (Supplementary figure 4B).

295

### 296 **MCPH1 binds condensin II via a short linear motif.**

297 To address which part of MCPH1's central domain is necessary for binding condensin  
298 II, we analysed the sequence of MCPH1 using the ConSurf server<sup>46,47</sup> to identify  
299 conserved sequences. Between residues 381-435 of human MCPH1, the 410-424  
300 interval stands out as a highly conserved patch within a region that is otherwise poorly  
301 conserved (Figure 5B and Supplementary figure 4C). Despite its conservation, the

302 sequences are predicted to be disordered, suggesting that it could be a short linear  
303 motif (SLiM) that binds to condensin II. To test this, we performed fluorescence  
304 polarisation binding assays with a 5-FAM labelled MCPH1 peptide spanning residues  
305 407-424 and found that it bound to condensin II, with a fit  $K_d$  of  $0.64 \pm 0.12 \mu\text{M}$  (mean  
306  $\pm$  SEM) (Figure 5F). As expected, no binding was detected to a tetrameric version of  
307 condensin II lacking NCAPG2.

308 SLiMs are frequently regulated by post-translation modification <sup>48</sup> and  
309 proteomic analysis of mitotic cells previously found that MCPH1 can be  
310 phosphorylated within the central motif at S417 <sup>49</sup>, with S417/P418 forming a potential  
311 CDK consensus site <sup>50</sup>. We therefore used a fluorescence polarisation competition  
312 assay to test the effect of phosphorylating S417. In these assays, the concentration of  
313 condensin II and 5-FAM-MCPH1<sub>407-424</sub> is fixed and unlabelled peptides of either wild-  
314 type or S417 phosphorylated MCPH1<sub>407-424</sub> are added at increasing concentrations.  
315 While the wild-type MCPH1<sub>407-424</sub> readily competed with 5-FAM-MCPH1<sub>407-424</sub>,  
316 resulting in a fit competition  $K_D$  of  $5.3 \pm 1.0 \mu\text{M}$ , phosphorylation at S417 reduced the  
317 affinity  $\sim 10$  fold to  $53 \pm 8 \mu\text{M}$  (Figure 5G). This suggests that CDK1 phosphorylation  
318 of MCPH1 may reduce its interaction with condensin II, an effect that might have an  
319 important role in initiating chromosome condensation during prophase.

320

321 **MCPH1 central domain is essential for its interaction with condensin II and its**  
322 **regulation *in vivo*.**

323 To address whether this central motif is necessary for binding and regulating  
324 condensin II *in vivo*, we created an E14 cell line in which both copies of the *Ncaph2*  
325 gene is tagged at its C-terminus with GFP. Western blotting revealed MCPH1 in  
326 immunoprecipitates generated using antibodies against GFP, and only in GFP-tagged

327 cells expressing wild-type MCPH1 (Figure 6A). Because the MCPH1-specific antibody  
328 was raised against the central domain, we used a cell line in which both copies of  
329 *Mcph1* and *Ncaph2* were tagged with GFP and Halo respectively to test the role of the  
330 central domain motif and then created a variant (*Mcph1*<sup>ΔCenGFP/ΔCenGFP</sup>) lacking 15  
331 residues containing the motif (S<sub>400</sub>SYEDYFSPDNLKER<sub>414</sub>). Western blotting  
332 confirmed that *Mcph1*<sup>GFP/GFP</sup> cells and *Mcph1*<sup>ΔCenGFP/ΔCenGFP</sup> were expressed at similar  
333 levels (Figure 6C). The slightly increased mobility of *Mcph1*<sup>ΔCenGFP/ΔCenGFP</sup> and its  
334 failure to be detected by the MCPH1-specific antibody confirmed deletion of the central  
335 domain motif (Figure 6B). Because TMR labelled NCAPH2-Halo was detected in GFP  
336 immunoprecipitates from *Mcph1*<sup>GFP/GFP</sup> but not *Mcph1*<sup>ΔCenGFP/ΔCenGFP</sup> cells (Figure 6C),  
337 we conclude that MCPH1's central domain is essential for its stable interaction with  
338 condensin II *in vivo*.

339 Immunofluorescence revealed that MCPH1 and MCPH1<sup>ΔCen</sup>-GFP proteins  
340 show the same localisation within cells. They are both exclusively nuclear and  
341 enriched in small clusters that colocalise with sites of DNA damage marked by γH2aX  
342 DNA (Figure 6D), as previously reported<sup>51</sup>. The significance of this association is  
343 unclear as *Mcph1* deletion has no effect on the level of γH2aX (Supplementary figure  
344 1D). Crucially, the chromosomes of *Mcph1*<sup>ΔCenGFP/ΔCenGFP</sup> but not *Mcph1*<sup>GFP/GFP</sup> G1 and  
345 G2 cells adopted the prophase-like appearance characteristic of *Mcph1* deleted cells  
346 (Figure 6E). Therefore, we conclude that MCPH1's central domain SLiM is essential  
347 for inhibiting condensin II during interphase and inhibiting premature condensin-  
348 mediated chromatin condensation.

349

350 **MCPH1 does not alter condensin II ATPase activity or DNA binding *in vitro*.**

351 To address whether MCPH1 affects condensin II's activity *in vitro*, purified the  
352 condensin II- MCPH1<sub>1-435</sub> complex using size exclusion chromatography and  
353 measured its ATPase activity. The condensin II-MCPH1<sub>1-435</sub> complex possessed a  
354 similar activity to that of condensin II alone but its stimulation by DNA was modestly  
355 lower (Figure 7A). To ensure that the ATPase activity measured in these assays was  
356 genuinely due to condensin II, we also purified a condensin II-MCPH1<sub>1-435</sub> complex  
357 deficient in ATP binding (Q-loop mutation, SMC2 Q147L, SMC4 Q229L). As expected,  
358 this mutation effectively eliminated ATPase hydrolysis (Figure 7A).

359 Previous work has suggested that full length MCPH1 binds to DNA and  
360 chromatin<sup>33,42</sup> so we tested whether MBP-MCPH1<sub>1-435</sub> and MBP-MCPH1<sub>196-435</sub> are  
361 able to bind to a 50 bp sequence of dsDNA using electrophoretic mobility shift assay  
362 (EMSA). Both MCPH1<sub>1-435</sub>-MBP and MCPH1<sub>196-435</sub>-MBP were able to induce a shift,  
363 however higher concentrations of MCPH1<sub>196-435</sub> MBP were required for a complete  
364 shift in the free DNA band, suggesting MCPH1<sub>1-195</sub> MBP could have a role in DNA  
365 binding (Figure 7B). We then examined if MCPH1 affected condensin II DNA binding,  
366 by performing condensin II EMSAs in the presence or absence of MCPH1<sub>1-435</sub>-MBP.  
367 The distinct MCPH1<sub>1-435</sub>-MBP shifted band disappeared with increasing  
368 concentrations of condensin II, and there was an upward shift in the condensin II  
369 bands in the presence of MCPH1<sub>1-435</sub>-MBP relative to the MBP condensin II control,  
370 suggesting MCPH1 was binding with condensin II (Figure 7C). We then performed  
371 condensin II EMSAs in the presence or absence of 1 $\mu$ M 5-FAM-MCPH1<sub>407-424</sub> peptide.  
372 5-FAM signal was present with condensin II shifted DNA band demonstrating that the  
373 MCPH1 peptide was sufficient to mediate comigration of MCPH1 with condensin II  
374 (Figure 7D). Additionally, the presence of the 5-FAM-MCPH1<sub>407-424</sub> peptide did not  
375 affect condensin II DNA binding. Collectively, this indicates that *in vitro*, using purified

376 proteins, condensin II can bind MCPH1 and DNA simultaneously. Finally, these results  
377 suggest that the inhibitory effect of MCPH1 on condensin II loading observed *in vivo*  
378 involves a feature absent from the *in vitro* DNA binding assay.

379

380 **MCPH1 overexpression inhibits the loading of condensin II on mouse meiotic**  
381 **chromosomes.**

382 Our results show that MCPH1 plays a crucial role in chromosome organisation during  
383 interphase by inhibiting condensin II's activity in mitotic cells. We next extended our  
384 analysis of MCPH1 to meiotic cells by testing the effect of increased MCPH1  
385 expression during the first meiotic division of mouse oocytes. To image the  
386 chromosomes, oocytes were injected with *in vitro* transcribed mRNA coding for H2B-  
387 mCherry to illuminate the chromosomes in magenta (Figure 8A). As previously  
388 described<sup>52</sup>, after the germinal vesicle breakdown (GVBD), bivalent chromosomes  
389 form a ball (3.3 h) before congressing to a metaphase plate (7.4 h). Cleavage of  
390 cohesin by separase along chromosome arms then converts each bivalent into a pair  
391 of dyads that segregate highly synchronously to opposite poles of the cells during  
392 anaphase I (10 h), which is followed by extrusion of the first polar body (Figure 8B,  
393 control).

394 Co-injection with *M. musculus* MCPH1 mRNAs (Figure 8B, +MCPH1) had little  
395 effect on the chromosome congression until metaphase. However, it caused  
396 chromosomes to unravel soon after the onset of anaphase, presumably because  
397 chromosomes are not stiff enough to resist to the pulling forces of the spindle, and this  
398 was accompanied by a catastrophic failure to disjoin the chromosome arms of dyads  
399 to opposite poles (Figure 8B, +MCPH1, 16 h). The lack of chromosome rigidity and



400 the unravelling of the chromatin in response to traction by the spindle are reminiscent  
401 of the phenotype caused by depletion of NCAPH2<sup>52</sup>.

402 To address whether MCPH1 overexpression inhibits the association of  
403 condensin II with chromosomes, we rescued mouse oocytes deleted for *Ncaph2*  
404 (*Ncaph2<sup>Lox/Lox</sup>, ZP3<sup>TgCre</sup>*) by injecting an mRNA coding for NCAPH2-GFP as previously  
405 described<sup>52</sup>. These oocytes were also injected with mRNA encoding MAD2 to arrest  
406 them in meiosis I and H2B-mCherry to image and quantify the amount of chromosomal  
407 NCAPH2-GFP (Figure 8C). This revealed that the injection of MCPH1 mRNAs greatly  
408 reduced association of condensin II with chromosomes during metaphase I (Figure 8D  
409 and E). To see if MCPH1 can also release condensin II previously associated with  
410 chromosomes, we injected MCPH1 mRNA into meiosis I arrested oocytes. However,  
411 this induced a much milder reduction within the first two hours (not shown), suggesting  
412 that MCPH1 prevents the initial loading of condensin II on chromosomes but has little  
413 effect on complexes already stably associated with them.

414 The N-terminal BRCT domain of MCPH1 was previously shown to have an  
415 essential role in regulating chromosome condensation both *in vitro* and *in vivo*<sup>33</sup>.  
416 Consistent with this, deletion of the N-terminal 200 amino acids of MCPH1 abolishes  
417 its inhibitory effect in mouse oocytes (Figure 8D). It has also been claimed that the N-  
418 terminal domain of MCPH1 can on its own inhibit condensin II by competing for its  
419 binding sites on chromosomal DNA<sup>33</sup>. However, we were unable to detect any impact  
420 of over-expressing only the NTD of MCPH1 (not shown).

421

#### 422 **Fusion of SMC2 to NCAPH2 is resistant to MCPH1 inhibitory effect.**

423 The effects of MCPH1 on condensin II resemble those of WAPL on cohesin, which is  
424 thought to act by dissociating the NTD of its kleisin from the neck of SMC3's

425 ATPase domain<sup>18,19,53</sup>. A key finding in this regard is that the fusion of the C-terminus  
426 of SMC3 to the N-terminus of SCC1 causes cohesin to resist WAPL. To address  
427 whether fusion of this nature has similar effect on condensin II, we created a cDNA  
428 encoding a protein in which the C-terminus of SMC2 and the N-terminus of NCAPH2  
429 are connected by a 57 amino acid linker containing three TEV protease cleavage sites.  
430 A GFP tag was introduced at the C-terminal end of NCAPH2 to image the protein  
431 (Figure 9A). Importantly, mRNAs encoding this fusion fully rescued the meiosis I  
432 chromosome segregation defects of oocytes deleted for *Ncaph2*. Furthermore, GFP  
433 fluorescence associated with the fusion protein was detected along the chromosome  
434 axes of bivalent chromosomes, a distribution that is similar if not identical to that of  
435 wild-type NCAPH2. Remarkably, co-injection of MCPH1 mRNAs had no adverse  
436 effect on this activity, unlike controls in which MCPH1 mRNAs were co-injected with  
437 NCAPH2-GFP mRNAs (Figure 9B and C). Likewise, MCPH1 prevented association of  
438 NCAPH2-GFP with chromosomes but not that of the SMC2-NCAPH2-GFP fusion  
439 (Figure 9C).

440 A caveat to this experiment is that the resistance to MCPH1 of the SMC2-  
441 NCAPH2-GFP fusion could be due to the linker sequences associated with the N- and  
442 C-termini of NCAPH2 and SMC2 respectively rather than their stable inter-connection  
443 *per se*. If the latter were the case, cleavage of the linker using TEV protease should  
444 restore sensitivity to MCPH1. We therefore repeated the rescue experiment but, in this  
445 case co-injected mRNA encoding TEV protease (Figure 9D). Quantification of the  
446 chromosomal GFP fluorescence showed that the fusion's resistance to MCPH1  
447 activity is abolished by the TEV (Figure 9E and F), which is consistent with the notion  
448 that resistance arises from connecting the interface between SMC2 and NCAPH2.

449

450 ***Mcph1* deletion induces the coiling of cohesin vermicelli.**

451 Our results suggest that condensin II's association with chromosomal DNA might be  
452 regulated by MCPH1 through a mechanism that resembles that of cohesin by WAPL.  
453 By inducing cohesin's dissociation from chromatin, albeit only rarely approximately  
454 every 15 min., WAPL merely moderates the processivity of loop extrusion mediated  
455 by cohesin. MCPH1 has a more drastic effect, preventing most condensin II  
456 complexes from ever associating stably with chromatin. The entire architecture of  
457 interphase chromatin therefore depends on these two key regulatory factors. Though  
458 condensin II is presumed like cohesin to act as a DNA loop extruder, the deregulation  
459 of cohesin and condensin II induces different chromosomal morphologies. *Wapl*  
460 deletion enables cohesin to form thread-like structures and to accumulate along their  
461 longitudinal axes, creating so called vermicelli. In contrast, *Mcph1* deletion enables  
462 condensin II to produce soft spherical or "gumball" chromosomes and to associate  
463 stably throughout chromosomal DNA, albeit at high levels at centromeres. Strangely,  
464 condensin II does not form or accumulate along the sort of axes observed when wild  
465 type cells enter mitosis. Thus, the activities of condensin II and cohesin unleashed by  
466 *Mcph1* and *Wapl* deletion respectively produce DNA loops with very different  
467 arrangements. We therefore set out to address two questions. First, is this difference  
468 intrinsic to differences in the behaviour of cohesin and condensin II or merely due to  
469 differences in the type of cell used, namely mouse fibroblasts and ES cells? Assuming  
470 that it is in fact, the former, what happens when both factors are deregulated  
471 simultaneously? To this end, we altered the *Mcph1* and *Wapl* genes in E14 cells in  
472 which SCC1 is tagged with Halo and NCAPH2 with GFP. Because *Wapl* deletion is  
473 lethal, we generated a tamoxifen-inducible deletion allele, which enabled us to  
474 compare chromosomal DNA morphology as well as localisation of SCC1-Halo and

475 NCAPH2-GFP in four different conditions: Wild type,  $\Delta Wapl$ ,  $\Delta Mcph1$  and the double  
476 mutation  $\Delta Wapl$ ,  $\Delta Mcph1$  (Supplementary figure 5).

477 In wild-type cells, SCC1-Halo accumulates throughout nuclei and their  
478 genomes during interphase and apart from centromeres, is largely removed from  
479 chromosomes through the action of WAPL in M phase. Condensin II's distribution  
480 resembles that of cohesin throughout most of interphase (Figure 2 and <sup>8</sup>). Condensin  
481 II accumulates around centromeres during G2 and along the chromatid axes created  
482 through its activity during prophase (Figure 10, WT).

483 As previously reported for fibroblasts, *Wapl* deletion in E14 cells causes  
484 cohesin to create chromatid-like structures, especially during G2, and to accumulate  
485 along their longitudinal axes <sup>2</sup>. Because the majority of SCC1 remains on  
486 chromosomes during mitosis, most is cleaved by separase during anaphase and  
487 daughter cells inherit considerably less cohesin than normal. As a consequence, axial  
488 cohesin vermicelli are rarely if ever observed during G1, especially as this cell cycle  
489 phase is very short in ES cells. Pronounced vermicelli are only observed in G2. As  
490 expected, *Wapl* deletion neither alters condensin II's distribution during interphase nor  
491 hinders its accumulation along chromatid axes during mitosis. Despite cohesin's  
492 persistence on mitotic chromosomes and the participation of a large fraction in sister  
493 chromatid cohesion, condensin II still manages to localise to and help create the axes  
494 of individual chromatids, between which run inter-chromatid axes coated in cohesin  
495 (Figure 10A and B,  $\Delta Wapl$ ). There are presumably two pools of chromosomal cohesin  
496 in post-replicative *Wapl* deleted cells, one involved in cohesion and a second engaged  
497 in the loop extrusion responsible for the formation of vermicelli. The former clearly  
498 persists and accumulates along the inter-chromatid axis when loop extrusion mediated  
499 by condensin I and II individualise chromatids, but the fate of the latter is unclear.

500 Deletion of *Mcph1* had little effect on cohesin's distribution. Despite the  
501 formation of gumball chromosomes during G1 and G2, cohesin remains uniformly  
502 associated with chromatin and does not form vermicelli. As in wild type cells, most  
503 dissociates from chromosome arms when cells enter mitosis and little can be detected  
504 along the inter-chromatid axes connecting the two condensin II axes of individualised  
505 chromatids (Figure 10,  $\Delta Mcph1$ ).

506 Deletion of both *Wapl* and *Mcph1* had a dramatic effect. The cohesin vermicelli  
507 caused by the lack of WAPL in G2 cells adopt a coiled configuration upon the  
508 simultaneous deletion of *Mcph1*. This coiling increases during prophase. By the time  
509 cells reach metaphase, the coiling leads to the formation of chromosomes that have  
510 the shape of a spring (or solenoid), a configuration that is visible with SCC1-Halo,  
511 NCAPH2-GFP and DNA staining (DAPI) (Figure 10,  $\Delta Wapl$ ,  $\Delta Mcph1$ ). Moreover, the  
512 two distinct axes of condensin II associated with each chromatid remain intermingled  
513 in the double mutant.

514 To analyse the axial organisation of these chromosomes in greater detail, we  
515 used super-resolution three-dimensional structured illumination microscopy (3D-SIM)  
516 to compare the distribution of SCC1-Halo in *Wapl* deleted and double mutant cells.  
517 Unfortunately, fluorescence due to NCAPH2-GFP was insufficient to reveal reliable  
518 images using this technique. Analysis of G2 cells revealed that a modest coiling of  
519 cohesin axes surrounded by DNA loops in *Wapl* single mutants is greatly accentuated  
520 in double-mutant cells, with a pronounced increase in the radii of coils (Figure 11 and  
521 Supplementary video 1). In metaphase cells, the cohesin axes that seem to have a  
522 spring-like appearance in confocal microscopy are revealed to have a much more  
523 complicated organisation, being composed of twisted segments that regularly change  
524 handedness. It is noticeable that the formation of chromosomes with this morphology

525 is not simply due to the combined activity/presence of cohesin and condensin II during  
526 mitosis, which also occurs in *Wapl* single mutants. It only arises when both cohesin  
527 and condensin were stably associated with chromatin during G2.

528 We conclude that combining the abnormal activity of condensin II unmasked by  
529 deleting *Mcp1* with that of cohesin unmasked by deleting *Wapl* leads to a major  
530 transformation of chromosome structure when cells enter G2, that is associated with  
531 coiling of the entire axis of the chromosome. Interestingly, this coiling does not have a  
532 handedness that persists throughout the chromosome in metaphase. Instead, the  
533 chromosome appears divided into segments whose axes are coiled with alternating  
534 handedness.

535

## 536 **DISCUSSION**

537 Despite accumulation within interphase nuclei, condensin II associates with chromatin  
538 only fleetingly if at all and exerts little or no effect on chromosome topology during this  
539 phase of the cell cycle. It normally only associates stably with chromosomal DNA and  
540 organises it into a series of loops when cells enter M phase. The restriction of  
541 condensin II's activity to M phase was previously attributed to its phosphorylation by  
542 CDK1<sup>27,40,41,43</sup>. Our finding that in the absence of MCPH1, condensin II is capable of  
543 transforming the topology of chromosomal DNA in cells arrested in G2 using a CDK1  
544 inhibitor implies that condensin II is capable of substantial activity in the absence of  
545 CDK1-mediated phosphorylation normally associated with M phase. In other words, it  
546 is MCPH1 that prevents condensin II's association with chromosomes during G2 not  
547 the lack of CDK1 phosphorylation.

548 Our observation that phosphorylation of a CDK1 consensus sequence  
549 abolishes association between a conserved and essential SLiM within MCPH1's

550 central domain and condensin II's NCAPG2 subunit raises the possibility that CDK1  
551 exerts at least part of its effect by preventing MCPH1's association with condensin II.  
552 Our conclusion that the SLiM within MCPH1's central domain is essential for its  
553 inhibitory activity contradicts the claim that it is not necessary, an inconsistency that  
554 we attribute to the fact that previous studies tested the function of over-expressed  
555 MCPH1 alleles <sup>33,54</sup>.

556 Our findings as well as those of others <sup>30,31,35</sup> show that MCPH1 is responsible  
557 for inhibiting condensin II during G1 as well as G2 phase. Thus, in the absence of  
558 MCPH1, condensin II organises chromosomal DNAs into chromatid-like structures  
559 during G1 and G2 but strikingly not during S phase when some other (MCPH1-  
560 independent) mechanism prevents it from associating stably with chromatin.

561 MCPH1's inhibition of condensin II depends on its N-terminal BRCT domain in  
562 addition to its central SLiM. Indeed, most of *McpH1* mutations identified in  
563 microcephaly patients affect the BRCT domain, which possibly interacts with some  
564 other part of condensin II once MCPH1 has been recruited via its SLiM. However, the  
565 function of this domain remains mysterious.

566 How does MCPH1 inhibit condensin II? An important clue stemmed from the  
567 numerous similarities between MCPH1 and WAPL, a protein that facilitates cohesin's  
568 release from chromatin <sup>1</sup>. WAPL binds to STAG, the cohesin subunit equivalent to  
569 NCAPG2, using a SLiM and its inactivation leads to cohesin's stable association with  
570 chromatin <sup>2,7,55</sup>. Cohesin release mediated by WAPL involves dissociation of the NTD  
571 of cohesin's SCC1 kleisin subunit from the coiled coil that emerges from SMC3's  
572 ATPase head, known as its neck <sup>18,19,53</sup>. It is currently thought that kleisin-neck  
573 dissociation takes place, albeit rarely, upon engagement of cohesin's SMC1 and  
574 SMC3 ATPase heads in the presence of ATP when SMC3 is unacetylated and in the

575 absence of SCC2<sup>18,19,56,57</sup>. Crucially, the fusion of SMC3's C-terminus to SCC1's N-  
576 terminus completely blocks WAPL from triggering cohesin's release from chromatin  
577<sup>19,53</sup>. It could do so either by creating a barrier to the passage of DNA through an  
578 opened kleisin-neck interface, i.e. by blocking the exit of DNAs previously entrapped  
579 within cohesin rings, or merely by hindering kleisin-neck dissociation, which has some  
580 other poorly understood function necessary for release.

581 Our finding that an analogous fusion, between the C-terminus of SMC2 and the  
582 N-terminus of NCAPH2, prevents the release of condensin II from meiosis I  
583 chromosomes in oocytes upon over-expression of MCPH1 suggests that MCPH1  
584 prevents condensin II's association with chromatin by a mechanism that is similar to  
585 cohesin's release by WAPL. It has been reported that engagement of SMC2 and  
586 SMC4 heads triggered by ATP binding induces the release of the NTD of the kleisin  
587 from SMC2's neck<sup>21,58</sup>, raising the possibility that MCPH1 blocks condensin II's stable  
588 association with chromatin by facilitating such a process. Irrespective of the actual  
589 mechanics, which remains poorly understood, our observations emphasise that  
590 MCPH1 blocks condensin II's association with chromosomes using a mechanism  
591 similar to that that employed by WAPL to cause cohesin release.

592 Despite these striking similarities, the mode of action of these two proteins may  
593 differ in an important respect. Though WAPL alters cohesin's residence time on  
594 chromatin exclusively by facilitating release, our finding that over-expression of  
595 MCPH1 in oocytes prevents *de novo* association of condensin II but does not remove  
596 complexes previously associated with chromosomes raises the possibility that MCPH1  
597 acts predominantly by aborting *de novo* loading.

598 Recent advances have shown that both human condensin and cohesin  
599 complexes extrude DNA loops<sup>5,59-61</sup>, and cryo-electron microscopy structures of yeast



600 condensin, and yeast and human cohesin are starting to provide insight into how these  
601 complexes engage with DNA <sup>58,62–64</sup>. In the case of cohesin, it has been suggested  
602 that an early step is the clamping of DNA on top of SMC1 and SMC3 ATPase domains  
603 that have engaged with each other in the presence of ATP. Clamping in this manner  
604 requires cohesin's SCC2 HAWK protein, which is equivalent to condensin II's  
605 NCAPD3. SCC2 is necessary to prevent cohesin's release from chromatin and may  
606 perform this function by preventing dissociation of its kleisin subunit from SMC3's neck  
607 <sup>57,62</sup>. If NCAPD3 had a similar role, then MCPH1 could conceivably block condensin  
608 II's association with chromatin by interfering with NCAPD3's ability to block the release  
609 of NCAPH2 from SMC2.

610         One of the earliest insights into the cell division cycle was that one of the main  
611 constituents of the nucleus undergoes a dramatic morphological transformation shortly  
612 before division, namely the transformation of an apparently amorphous mass of  
613 chromatin into thread-like structures now known as chromosomes, each composed of  
614 a pair of chromatids joined together. It is now recognised that this transformation is  
615 brought about by condensins I and II which act by extruding DNA loops. It is also  
616 recognised that interphase chromosomal DNA is not in fact amorphous but instead  
617 characterised by a complex and dynamic network of interactions known as  
618 topologically associated domains or TADs, which are created by cohesin that like  
619 condensin is a DNA loop extruder, albeit one that is active during interphase and  
620 blocked by the site specific DNA binding protein CTCF <sup>55,65</sup>.

621         There are two reasons why DNAs are not organised into thread-like chromatids  
622 during interphase. By causing cohesin release, WAPL prevents loop extrusion by  
623 cohesin going to completion while MCPH1 prevents condensin II associating with DNA  
624 stably and thereby extruding loops. Crucially, inactivation of either protein leads to the

625 formation of chromatid-like structures during interphase, albeit by different loop  
626 extruders and with different actual morphologies. Interestingly, depletion of both  
627 proteins simultaneously leads to a major transformation of chromosome structure as  
628 cells enter mitosis, which is associated with coiling of the entire axis of the  
629 chromosome. Understanding how and why this comes about through the unregulated  
630 activities of cohesin and condensin II may help reveal further insight into how loop  
631 extrusion creates chromosomes.

632

### 633 **Glossary:**

634 HAWK, HEAT repeat protein associated with the kleisin

635 LE, loop extrusion

636 PLC, prophase like cells

637 SLiM, short linear motif

638 TADs, topologically associating domains

639 Cryo EM, cryo electron microscopy

640 AFM, atomic force microscopy

641 GVBD, germinal vesicle break down

642

### 643 **Acknowledgements**

644 We thank N. Halidi and C. Monico for technical assistance, M. Inês Baptista for her  
645 advice on cloning the STOP cassette, A. Szczurek for his help in fluorescence  
646 quantification, S. Mahara for FACS analysis, M. Ranes and S. Guettler for the MBP  
647 vector and N. Davey for SLiM conversations.

648

### 649 **Funding**

650 This work was supported by the Wellcome Trust (Grant Ref 107935/Z/15/Z), ERC  
651 grant (Proposal No 294401) and Cancer Research UK (26747). Imaging was  
652 performed at the Micron Oxford Advanced Bioimaging Unit funded by a Wellcome  
653 Trust Strategic Award (091911 and 107457/Z/15/Z). Funding for MSS was provided  
654 by the Paul and Daisy Soros Foundation.

655

#### 656 **Author contribution**

657 MH design, performed the experiments, wrote the manuscript and coordinated the  
658 project. EC designed, performed all the *in vitro* biochemistry experiments and wrote  
659 the manuscript. JG provided advice for the manipulation of oocytes. LS acquired and  
660 analysed the SIM data. APA performed the Hi-C experiments. ELA supervised HiC  
661 experiments and wrote the corresponding section. MSS and DW processed and  
662 analyzed the Hi-C data. AV supervised the project and wrote the manuscript. KN  
663 supervised the project and wrote the manuscript.

664

#### 665 **Competing financial interests**

666 The authors declare no competing financial interests.

667

668

669

670 **FIGURE LEGENDS**

671 **Figure 1.** *The deletion of Mcph1 in E14 cells induces condensin II-dependent*  
672 *chromosome condensation in both G1 and G2 phases of the cell cycle. (A)* In gel TMR-  
673 Halo detection and Western blot analysis of E14 cells wild type, *Ncaph2<sup>Halo/Halo</sup>* and  
674 *Ncaph2<sup>Halo/Halo</sup> Mcph1<sup>ΔΔ</sup>*. TMR signal detects NCAPH2-Halo tagged. The anti-  
675 NCAPH2 antibody shows that all the NCAPH2 protein expressed is fused to the Halo-  
676 tag and that the expression levels are similar to wild type but reduced after *Mcph1*  
677 deletion. The anti-SMC2 detection shows similar levels of condensin in the three cell  
678 lines. **(B)** Immunofluorescence analysis of Histone H3 phosphorylated on serine 10  
679 (green) combined with TMR detection of NCAPH2-Halo (Red) in *Mcph1<sup>wt/wt</sup>* and  
680 *Mcph1<sup>ΔΔ</sup>* cells. The DNA organization was analysed using Hoechst. **(C)** EdU  
681 incorporation in *Mcph1<sup>wt/wt</sup>* or *Mcph1<sup>ΔΔ</sup>* cells. **(D)** Western blot analysis of Halo-  
682 PROTAC induced NCAPH2-Halo degradation in wild-type, *Ncaph2<sup>Halo/Halo</sup> Mcph1<sup>wt/wt</sup>*  
683 and *Ncaph2<sup>Halo/Halo</sup> Mcph1<sup>ΔΔ</sup>* cells using an anti-NCAPH2 antibody. Anti-SCC1 was  
684 used as a loading control. **(E)** Immunofluorescence analysis of the chromosome  
685 decompaction induced by 16 h treatment of *Mcph1<sup>ΔΔ</sup>* cells with Halo-PROTAC.  
686 Immunofluorescence analysis of Histone H3 phosphorylated on serine 10 (green) was  
687 used to compare similar cell cycle stages. Scale bar, 5 μm.

688

689 **Figure 2.** *Mcph1 deletion induces the stable binding of condensin II to the condensed*  
690 *chromosomes in interphase. FRAP analysis of NCAPH2-Halo turn-over on chromatin*  
691 *in Mcph1<sup>wt/wt</sup> (A) and Mcph1<sup>ΔΔ</sup> cells (B).* Top row: NCAPH2-Halo signal pre-bleach,  
692 post bleach and after 70 sec recovery. The region bleached correspond to the white  
693 circle. Scale bar, 5 μm. **(C)** Quantification of the fluorescence recovery after  
694 photobleaching over a 10 min post-bleach period. (Average of three experiments, total

695 number of cells analysed: WT 28 cells, *Mcp1*<sup>ΔΔ</sup> 30 cells, standard deviation is  
696 represented for every time point)

697

698 **Figure 3.** *CDK1 activity is not required for the condensation phenotype induced by*  
699 *Mcp1 deletion.* **(A)** Western blot analysis of CDK1 phosphorylation on tyrosine 15 in  
700 wild type cells compared to *Mcp1* deleted cells. Wild-type protein extracts were  
701 treated by λ phosphatase as a control of antibody specificity. An anti-CDK1 protein  
702 was used as a loading control. **(B)** Immunolocalisation of Cyclin B in *Mcp1* deleted  
703 cells. **(C)** CDK1 activity was inhibited by incubating wild-type or *Mcp1* deleted cells  
704 to RO-3306 for 7 h. The cell cycle profile was analysed by FACS for both wild-type  
705 and *Mcp1* deleted cells without treatment or after 7 h incubation with 9 μM RO-3306.  
706 **(D)** All the G2 cells in *Mcp1* deleted cells present the condensed phenotype after  
707 CDK1 inhibition. Scale bar, 5 μm.

708

709 **Figure 4.** *Mcp1 deletion causes chromosome compaction and loss of*  
710 *chromocenters.* **(A)** Representative subset of interactions between chromosomes 1-7  
711 for wild-type and *Mcp1* deletion maps (wild-type below diagonal) shows loss of  
712 chromocenters in the *Mcp1* deletion maps. **(B)** Log fold change for *Mcp1* deletion  
713 over wild-type for chromosomes 1-7. **(C)** Log fold enrichment of the *Mcp1* deletion  
714 map over wild-type map for the aggregated inter-chromosomal matrix. **(D)** Balanced  
715 KR-normalized Hi-C Maps for wild-type and *Mcp1* deletion maps for the  
716 intrachromosomal region of chromosome 1 (wild-type below diagonal). Increased  
717 interactions between distant loci in the intrachromosomal *Mcp1* deletion maps is  
718 seen. Color scale threshold is at the average value of each respective Hi-C map. **(E)**  
719 Intrachromosomal contact probability for all chromosomes shows increased long-

720 range interactions and diminished contact drop-off for *McpH1* deletion. **(F)** Average  
721 intrachromosomal contact frequency for all chromosomes shows increased long-  
722 range interactions with *McpH1* deletion.

723

724 **Figure 5. Human condensin II interaction with MCPH1. (A)** Domain structure of  
725 MCPH1 and MBP fusion constructs that were expressed in *E. coli* and used in binding  
726 assays. BRCT domains are indicated in green and the central domain in yellow. **(B)**  
727 Conservation analysis of the MCPH1 central domain with the ConSurf server. **(C)**  
728 Strep tag pull-down indicating full length MCPH1 binds condensin II. Full length  
729 MCPH1 and condensin II were expressed in insect cells and separately purified,  
730 before being mixed on strep-tactin sepharose. Samples of input and resin after run on  
731 SDS page and visualised with silver stain. **(D)** Strep-tag pull-down assay indicating  
732 strep tagged condensin II pulls down MBP-MCPH1 constructs that contain the central  
733 domain, but not MBP-MCPH1<sub>1-195</sub> or MBP alone. SDS page gel visualised with  
734 Coomassie stain. **(E)** Strep pull-down assay showing strep-tagged pentameric  
735 condensin II or tetrameric condensin II lacking NCAPD3 can pull down MBP-MCPH1<sub>1-</sub>  
736 <sub>435</sub>, while tetrameric condensin lacking NCAPG2 does not pull down MCPH1. The  
737 lower panel shows a western blot performed using strep-resin samples, blotted using  
738 an anti-NCAPD3 antibody. **(F)** Fluorescence polarization binding assay using 5-FAM  
739 labelled MCPH1<sub>407-424</sub> peptide and increasing concentration of either pentameric  
740 condensin or tetrameric condensin II lacking MCPH1 binding subunit NCAPG2  
741 (CIIΔG2). **(G)** Peptide competition assay using a fixed concentration of 5-FAM labelled  
742 MCPH1<sub>407-424</sub> and condensin II with an increasing amount of MCPH1<sub>407-424</sub> wild-type  
743 or phosphorylated at serine 417. All error bars indicate standard deviation from three  
744 replicates.

745

746 **Figure 6.** *MCPH1* interaction with condensin II is essential to prevent interphasic  
747 chromosome condensation. **(A)** Co-immunoprecipitation of MCPH1 with NCAPH2-  
748 GFP. Nuclear extracts were prepared from wild type, *Ncaph2*<sup>GFP/GFP</sup> and  
749 *Ncaph2*<sup>GFP/GFP</sup> *Mcph1*<sup>Δ/Δ</sup> cells. Immunoprecipitation was performed using GFP-trap  
750 agarose beads and analysed by western blot using an anti-MCPH1 antibody (IP-GFP).  
751 5% of the lysate used for IP was loaded as INPUT control. Anti-Lamin B1 antibody  
752 was used as a loading control. **(B)** Deletion of the central domain of MCPH1. To  
753 address if the central domain of MCPH1 is necessary to mediate the interaction with  
754 condensin II, we first introduced a GFP-tag at the C-terminal end of MCPH1 in  
755 *Ncaph2*<sup>Halo/Halo</sup> cells as the antibody against the protein was raised against the central  
756 domain. Then a second targeting was done to delete the central domain. As a result,  
757 the western blot represented in panel B using anti-MCPH1 antibody detects the wild-  
758 type protein or the GFP-tagged protein, homozygous *Mcph1*<sup>GFP/GFP</sup> but does not detect  
759 anything after deletion of the central domain. Using anti-GFP antibody reveals that the  
760 protein deleted for the central domain is present in the cell at similar levels as the wild-  
761 type GFP-tagged protein. A slight decrease in size is observed due to the deletion of  
762 the central domain. Anti-Lamin B1 antibody was used as a loading control. **(C)** Co-  
763 immunoprecipitation of NCAPH2-Halo with MCPH1-GFP. Nuclear extracts were  
764 prepared from *Ncaph2*<sup>Halo/Halo</sup>, *Ncaph2*<sup>Halo/Halo</sup>*Mcph1*<sup>GFP/GFP</sup> and  
765 *Ncaph2*<sup>Halo/Halo</sup>*Mcph1*<sup>ΔcenGFP/ΔcenGFP</sup> cells. Immunoprecipitation was performed using  
766 GFP-trap agarose beads and analysed by in-gel detection of NCAPH2-Halo using the  
767 Halo-ligand TMR or by western blot using an anti-NCAPD3 antibody (IP-GFP). 5% of  
768 the lysate used for IP was loaded as input control. Anti-Lamin B1 antibody was used  
769 as a loading control. **(D,E)** Immunofluorescence analysis of the chromatin organisation

770 in *Ncaph2<sup>Halo/Halo</sup>Mcph1<sup>GFP/GFP</sup>* and *Ncaph2<sup>Halo/Halo</sup>Mcph1<sup>ΔcenGFP/ΔcenGFP</sup>* cells. MCPH1-  
771 GFP is only detected in the cell nucleus enriched in dots colocalising with some  $\gamma$ H2AX  
772 foci (D). The deletion of its central domain induces a similar condensation of  
773 interphasic chromosomes as the one observed after the complete loss of function of  
774 *Mcph1* (E).

775

776 **Figure 7.** *MCPH1 has little effect on condensin II ATP hydrolysis and DNA binding.*

777 **(A)** ATPase rate of condensin II complex in the presence of MCPH1. Q refers to  
778 condensin II with an ATPase deficient mutation in the Q-loop. Below is an SDS page  
779 gel of the completed reaction. Error bars indicate standard deviation from three  
780 repeats. **(B)** EMSA assay of MBP, MCPH1<sub>1-435</sub>-MBP and -MCPH1<sub>195-435</sub>-MBP using  
781 50 bp of Cy5 labelled dsDNA. **(C)** EMSA assay of condensin II in the presence of MBP  
782 or MCPH1<sub>1-435</sub>-MBP. **(D)** EMSA assay of condensin II in the presence or absence of  
783 5FAM-MCPH1 peptide. Top image detecting Cy5 and bottom imaged detecting 5FAM.  
784

785 **Figure 8.** *MCPH1 prevents the association of condensin II with chromosomes. (A)*

786 Cartoon summarizing the experimental procedure corresponding to panel B. **(B)** Wild-  
787 type mouse oocytes were injected at the GV stage with *in vitro* transcribed mRNA  
788 coding for H2B-mCherry alone to mark the chromosomes in magenta (Control) or in  
789 combination with MCPH1 (+MCPH1). Meiosis I progression was followed by live cell  
790 confocal imaging. The segregation defects observed in the presence of MCPH1 are  
791 indicated by a yellow arrowhead. Maximum intensity z projection images of the main  
792 time points are shown between 3.3 h post GVBD onwards (number of oocytes  
793 analysed in three independent experiments: control :12; +MCPH1: 19). **(C)** Cartoon  
794 summarizing the experimental procedure corresponding to panel D. **(D)** Oocytes from



795 *Ncaph2<sup>ff</sup> Tg(ZP3Cre)* females were injected at the GV stage with mRNA coding for  
796 H2B-mCherry, MAD2 and NCAPH2-GFP only (control) or in combination with MCPH1  
797 (+MCPH1) or MCPH1 deleted of the first N-terminal 200 amino acids (+MCPH1  $\Delta$ 200).  
798 Oocytes were arrested 16 h after GVBD in metaphase I owing to MAD2  
799 overexpression, and maximum-intensity z projection images of chromosomes were  
800 acquired by live cell confocal imaging (Total number of oocytes analysed in three  
801 experiments: control: 37, +MCPH1: 58, +MCPH1 $\Delta$ 200: 12). **(E)** Quantification of  
802 NCAPH2-GFP signal on the chromosomes. (Number of oocytes analysed in two  
803 independent experiments: control: 11; +MCPH1: 14). Scale bar, 5  $\mu$ m

804

805 **Figure 9.** *The closure of the SMC2-NCAPH2 interface prevents MCPH1 inhibitory*  
806 *effect. (A)* Schematic representation of the protein fusion between SMC2 C-terminus  
807 and the N-terminus of NCAPH2 using a linker comprising three TEV protease  
808 cleavage sites. **(B)** Cartoon summarizing the experimental procedure corresponding  
809 to panel C. **(C)** Oocytes from *Ncaph2<sup>ff</sup> Tg(ZP3Cre)* females were injected at the GV  
810 stage with mRNA coding for H2B-mCherry and MCPH1 in combination with NCAPH2-  
811 GFP (NCAPH2-GFP+MCPH1) or with the fusion (Fusion-GFP+MCPH1). Meiosis I  
812 progression was followed by live cell confocal imaging. Maximum intensity z-  
813 projections images of the time points corresponding to anaphase I when segregation  
814 defects are observed (total number of oocytes analysed in three experiments:  
815 NCAPH2-GFP+MCPH1: 17, Fusion-GFP+MCPH1: 18). **(D)** Cartoon summarizing the  
816 experimental procedure corresponding to panel E. **(E)** Oocytes from *Ncaph2<sup>ff</sup>*  
817 *Tg(ZP3Cre)* females were injected at the GV stage with mRNA coding for H2B-  
818 mCherry, MAD2 and Fusion-GFP only or in combination with TEV protease. Oocytes  
819 were arrested 16 h after GVBD in metaphase I owing to MAD2 over-expression and

820 maximum-intensity z-projection images of chromosomes were acquired by live cell  
821 confocal imaging. **(F)** Quantification of Fusion-GFP signal on the chromosomes (Total  
822 number of oocytes analysed in three experiments: Fusion: 9; Fusion + MCPH1: 14,  
823 Fusion + TEV: 13, Fusion + TEV + MCPH1: 18). Scale bar, 5  $\mu\text{m}$ .

824

825 **Figure 10.** *Mcph1* deletion induces the coiling of the vermicelli. **(A)**  
826 Immunofluorescence analysis of the chromatin organisation in the four conditions:  
827 wild-type,  $\Delta Wapl$ ,  $\Delta Mcph1$  and  $\Delta Wapl \Delta Mcph1$ . In order to compare cells that are in  
828 G2, prophase or metaphase, Histone H3-serine 10 (cyan) was used as a cell cycle  
829 marker. The localization of SCC1-Halo was analysed using Halo-JFX554, NCAPH2-  
830 GFP using nanobodies and DNA was detected using DAPI. **(B)** Magnified view of cells  
831 marked with a white star in panel A. Scale bar, 5  $\mu\text{m}$ .

832

833 **Figure 11.** *Super-resolution 3D-SIM analysis of G2 and metaphase cells deleted for*  
834 *Wapl or both Mcph1 and Wapl.* **(A)** Cells deleted for  $\Delta Wapl$  or  $\Delta Wapl + \Delta Mcph1$  in G2  
835 or metaphase (M) were analysed by 3D-SIM. Maximum intensity projections of 16  
836 consecutive mid sections covering 2  $\mu\text{m}$  in depth. The left panel shows DNA coloured in  
837 magenta and SCC1-Halo in green. The right panel shows the SCC1 signal with z-depth  
838 colour-coded. Scale bar, 5  $\mu\text{m}$  (inset, 1  $\mu\text{m}$ ) **(B)** Representative SCC1-Halo solenoid  
839 structure corresponding to one chromosome from a  $\Delta Wapl + \Delta Mcph1$  cell in G2 was  
840 segmented (green) and overlaid to the DNA (magenta). Scale bar, 2  $\mu\text{m}$ . **(C)** 3D  
841 surface rendering of the segmented and isolated solenoid from panel B. View from the  
842 top, right, left and bottom of one segmented solenoid. Scale bar, 1  $\mu\text{m}$ .

843

844

845 **SUPPLEMENTARY FIGURE LEGENDS**

846

847 **Supplementary figure 1.** *The cell cycle parameters are unchanged in Mcph1 deleted*  
848 *cells.* FACS analysis of the cell cycle parameters of *Mcph1* deleted cells compared to  
849 wild type: **(A)** Analysis of the DNA content using propidium iodide (repeated twice).  
850 **(B)** EdU incorporation (repeated twice). **(C)** H3 Phosphorylation on serine 10  
851 (repeated twice). **(D)** Western blot analysis of the amount of  $\gamma$ H2AX and H3  
852 phosphorylation on serine 10 in wild-type cells compared to *Mcph1* deleted cells. Scale  
853 bar, 5  $\mu$ m.

854

855 **Supplementary figure 2.** *Chromocenters disruption in Mcph1 deleted cells.*  
856 Immunofluorescence analysis of centromere clustering using CREST antibody  
857 showing that in *Mcph1* deleted cells, the centromeres are scattered in the nucleus  
858 even in replicating, EdU-positive cells.

859

860 **Supplementary figure 3.** *Mcph1 deletion decreases intra-compartment strength and*  
861 *does not affect looping.* **(A)** Pearson correlation map at 250 kB for wildtype and *Mcph1*  
862 deletion maps for the intrachromosomal region of chromosome 11 (wildtype below  
863 diagonal). **(B)** Pearson correlation map at 250 kB for wildtype and *Mcph1* deletion  
864 maps for the intrachromosomal region of chromosome 11 sorted by values of the  
865 principal eigenvector (wildtype below diagonal). Intra-compartmental interactions (A-  
866 A and B-B) vs inter-compartment interactions (A-B) show a relative decrease in the  
867 *Mcph1* deletion maps. **(C)** Aggregate peak analysis using the loop lists for both  
868 wildtype and *mcph1* deletion on both Hi-C maps shows no significant global change  
869 to chromatin looping, which is also verified by direct observation of the maps.

870

871 **Supplementary figure 4.** *Condensin I does not interact with MCPH1.* **(A)** Strep-tag  
872 pull-down assay indicating strep tagged condensin I does not pull-down any MBP-  
873 MCPH1 construct. SDS page visualised with Coomassie stain for input samples and  
874 silver stain for resin samples. **(B)** Condensin II and MBP-MCPH1<sub>196-435</sub> form a stable  
875 complex and co-elute in size exclusion chromatography. Elution profiles of condensin  
876 II + MBP-MCPH1<sub>196-435</sub>, condensin II alone and MBP-MCPH1<sub>196-435</sub> alone are shown  
877 in green, blue and red respectively. Fractions from void, condensin II and MCPH1  
878 peak were run on an SDS page and stained with Coomassie. **(C)** Sequence  
879 conservation map of MCPH1<sub>1-435</sub> generated using the ConSurf server<sup>46,47</sup>, with the  
880 central motif indicated. Colours range from non-conserved (green) to conserved  
881 (purple), 'b' indicates residues predicted to be buried and 'e' indicates residues  
882 predicted to be solvent-exposed.

883

884 **Supplementary figure 5.** *Western blot analysis of the four conditions analysed in*  
885 *Figures 10 and 11.* The first cell line is: *Ncaph2*<sup>GFP/GFP</sup> *Sccl*<sup>Halo/Halo</sup> *Wapl*<sup>TevLox/Δ</sup>  
886 *McpH1*<sup>wt/wt</sup>. The second cell line is: *Ncaph2*<sup>GFP/GFP</sup> *Sccl*<sup>Halo/Halo</sup> *Wapl*<sup>TevLox/Δ</sup> *McpH1*<sup>Δ/Δ</sup>.  
887 *Wapl* can be deleted in both cell lines after Tamoxifen treatment giving four  
888 experimental conditions: Wild type, Δ*Wapl*, Δ*McpH1* and Δ*Wapl* Δ*McpH1*.

889

## 890 MATERIAL AND METHODS

### 891 Mouse strain, *in vitro* culture and oocytes micro-injection.

892 *Ncaph2*<sup>tm1a(EUCOMM)Wtsi</sup> (MBCH;EPD0070-2-G090) were obtained from the Wellcome  
893 Trust Sanger Institute. The corresponding *lox* allele was obtained as previously  
894 described<sup>52</sup>. The fusion was obtained by cloning in frame *Smc2* cDNA, a linker  
895 containing three TEV protease cleavage sites  
896 (GGGGSGGGSGGGGTGSENLVYFQGPRENLYFQGGSENLVYFQGTGGGGSGGG  
897 GSGGGG), *Ncaph2* cDNA (Origene, MC200537) and the eGFP ORF in the pUC19  
898 vector.

899 Fully grown prophase-arrested GV oocytes were isolated and injected with mRNAs  
900 (5–10 pl) diluted in RNase-free water at the following concentrations: H2B–mCherry:  
901 150 ng  $\mu\text{l}^{-1}$ , Mad2: 200 ng  $\mu\text{l}^{-1}$ , NCAPH2–eGFP: 50 ng  $\mu\text{l}^{-1}$ , Fusion-EGFP (50 ng  $\mu\text{l}^{-1}$ ),  
902 MCPH1 (200 ng  $\mu\text{l}^{-1}$ ), TEV protease: 250 ng  $\mu\text{l}^{-1}$ . All experimental procedures were  
903 approved by the University of Oxford ethical review committee and licensed by the  
904 Home Office under the Animal (Scientific procedures) Act 1986. No statistical method  
905 was used to predetermine sample size. The experiments were not randomised and  
906 the investigators were not blinded to allocation during experiments and outcome  
907 assessment.

### 908 Live cell confocal imaging.

909 Oocyte live cell imaging was done in 4-well Labtek chambers (ref. 155383) in 4  $\mu\text{l}$   
910 drops of M16 medium covered with mineral oil (Sigma) in a 5% CO<sub>2</sub> environmental  
911 microscope incubator at 37 °C (Pecon). Images were acquired using an LSM-780  
912 confocal microscope (Zeiss) using the ZEN 2011 software. Between 7 and 12 slices  
913 (between 1 and 4  $\mu\text{m}$ ) were acquired every 5 to 15 min for each stage position using

914 the autofocus tracking macro developed in J. Ellenberg's laboratory at EMBL. For  
915 detection of eGFP and mCherry, 488-nm and 561-nm excitation wavelengths and  
916 MBS 488/561 filters were used. Images were further analysed using Volocity software.  
917 For high-resolution videos, the lens used was a C-Apochromat ×63/1.20 W Corr UV–  
918 VIS–IR. The fluorescence was quantified using Fiji.

#### 919 **E14 mouse embryonic stem cells culture**

920 E14 mouse embryonic stem cells were grown in Dulbecco's modified Eagle's medium  
921 (DMEM; Life Technologies) supplemented with 10% foetal calf serum (Seralab),  
922 2 mM L-glutamine (Life Technologies), 1x non-essential amino acids (Life  
923 Technologies), 50 µM β-mercaptoethanol (Life Technologies), 1X penicillin-  
924 streptomycin solution (Life Technologies) and leukaemia inhibitory factor (LIF) made  
925 in-house. All E14 cells were grown in feeder-free conditions on gelatinised plates at  
926 37 °C in a humid atmosphere with 5% CO<sub>2</sub>.

927 For conditional deletion of *Wapl*, Cre recombinase was induced by treating the cells  
928 with 800 nM 4-hydroxytamoxifen (OHT) for the indicated time. The degradation of  
929 NCAPH2-HALO was triggered by adding HaloTag® PROTAC Ligand (Promega) at  
930 1µM for 16 hours.

931 The Halo Ligands (Halo-TMR Ligand, Promega, Ref G8251) were added in the culture  
932 medium for 20 min at 100 nM. Cells were washed and left in the incubator with fresh  
933 medium for an extra 30 min to remove the unbound ligand before being analysed by  
934 immunofluorescence or western blot.

935

#### 936 **Genomic engineering using CRISPR Homology-directed repair**

937 The sgRNAs were designed using the CRISPOR online tool  
938 (<http://crispor.tefor.net/crispor.py>) and cloned in the pSptCas9(BB)-2A-Puro(PX459)-  
939 V2.0 vector (Addgene #62988). The sgRNA cloning was done according to the  
940 protocol from <sup>66</sup>.

941 To generate the targeting constructs, 1 kb homology arms were amplified by PCR (Q5-  
942 NEB) from E14 cells genomic DNA and cloned in pUC19 vector using Gibson  
943 Assembly Master Mix kit (New England Biolabs). The targeting construct was  
944 designed such that the guide RNA sequence used for the specific targeting was  
945 interrupted by the tag or contained silent mutations.

946 For each targeting, a 6 cm dish of E14 cells 50% confluent was transfected using 2 $\mu$ g  
947 of pX459-Cas9-sgRNA and 5  $\mu$ g of targeting construct using Lipofectamine 2000  
948 (ThermoFisher) according to manufacturer's guidelines. The next day, cells were  
949 trypsinised and plated at three different densities in 20 cm dishes in medium  
950 supplemented with puromycin (1  $\mu$ g/ml). The selection medium was removed 48 h  
951 later and cells were grown for approximately ten days. 96 Individual clones were then  
952 picked in 96 well plates, grown for 48 h and split into two 96 well plates. The next day,  
953 genomic DNA was prepared using 50  $\mu$ l of Lysis buffer (10 mM Tris HCl pH8, 1 mM  
954 EDTA, 25 mM NaCl, 200  $\mu$ g/ml Proteinase K), incubated at 65 °C for 1 h, 95 °C for 10  
955 min to inactivate Proteinase K. The clones were then screened by PCR (Q5-NEB) and  
956 amplified to be further analysed by western blot.

957

### 958 **Conditional Wapl deletion**

959 To generate the TEV protease conditional cells, a series of four tandem STOP  
960 cassette (Addgene, pBS.DAT-LoxStop, Jacks Lab) flanked by two LoxP sites was  
961 cloned between the pCAG promoter and the PK tagged TEV protease cDNA. The

962 CRE-ERT2 cDNA was cloned upstream under the transcriptional control of the  
963 Rosa26 Splice acceptor. This construct was then flanked by 1 kb homology arms to  
964 target the construct at the Rosa26 locus using CRISPR-HDR. After selecting and  
965 amplifying of the targeted E14 clones, the TEV protease could be detected by western  
966 blot 8 h post hydroxytamoxifen induction. Immunofluorescence analysis revealed a  
967 homogeneous expression of TEV protease in all the cells.

968 In the selected clones, three TEV protease cleavage sites were targeted in *Wapl*  
969 coding sequence after Proline 499 using CRISPR-HDR. After selecting of the targeted  
970 clones, it appeared that TEV cleavage of the *Wapl* protein led to a new steady-state  
971 in the cells in which a small amount of full-length protein was present preventing the  
972 formation of vermicelli. To avoid this compensation effect, we targeted loxP sites in  
973 the *Wapl* gene on both sides of exon 4 to induce the deletion of the gene  
974 simultaneously as the TEV cleavage of the protein already present in the cell. This  
975 combined strategy induced a complete loss of function of *Wapl* within 8 hours and the  
976 formation of vermicelli.

977

#### 978 **sgRNA used for CRISPR-HDR**

| <b><i>Targeted Gene</i></b> | sgRNA                 |
|-----------------------------|-----------------------|
| NCAPH2-GFP                  | GGTGGAAAGTAGTATATAACC |
| NCAPH2-Halo                 | GGTGGAAAGTAGTATATAACC |
| MCPH1 deletion Sg5'         | GGTGTGCAATTCCTAGTGTG  |
| MCPH1 deletion Sg3'         | AGCTGTTCTTAGAACACGA   |
| MCPH1-GFP                   | ACAGTGAGACATCTACAATG  |
| STOP-TEV                    | CATGGATTTCTCCGGTGAAT  |
| WAPL-Lox-TEV Sg5'           | AATGGGTGCTTATAATTAGC  |



|                    |                      |
|--------------------|----------------------|
| WAPL-Lox-TEV Sg3'  | ACAATGTCACAATGGCTCAT |
| SCC1-Halo          | ATAATATGGAACCGTGGTCC |
| DELCEN-MCPH1       | CGTTGAGGCTTCTTCCTATG |
| TEV sites in Wapl  |                      |
| Two Guide RNA used | AATGGGTGCTTATAATTAGC |
| in combination     | ACAATGTCACAATGGCTCAT |

979

### 980 **Immunofluorescence detection**

981 E14 cells were plated on glass coverslips (Marienfeld, High precision, 22x22, N°1.5H,  
982 Ref 0107052) in 6-well plates. 48 h later, cells were labelled with the Halo Ligand  
983 (Halo-JFX554, Janelia 100 nM 30 min)<sup>67</sup> or EdU (5 min at 10  $\mu$ M), washed PBS and  
984 then fixed in 3.8% Formaldehyde (Sigma-F8775) in PBS for 15 min. After three PBS  
985 washes, cells were permeabilised in 0.5% Triton X-100 in PBS for 10 min and then  
986 washed three times in PBS. After 20 min in blocking buffer: PBS 3% BSA (Sigma,  
987 A4503). The coverslips were transferred in a wet chamber and covered with 100  $\mu$ l of  
988 antibody solution in blocking buffer. After 1 h at room temperature, the coverslips were  
989 washed three times in blocking solution and incubated with the secondary antibody for  
990 1 h (AlexaFluor 594 or 488, 1/500, Life Technology). After three washes in PBS, DNA  
991 was labelled using Hoechst (Sigma, 33342, 5  $\mu$ g/ml) for 15 min. The coverslips were  
992 then washed in PBS, mounted in Vectashield (H1000) and sealed using nail varnish.  
993 Imaging was done using an LSM 780 confocal microscope (Zeiss) using the ZEN 2011  
994 software. EdU was detected according to the manufacturer's instruction (Click-iT EdU  
995 Imaging kit, Invitrogen). CDK1 inhibition was performed by incubating the cells in E14  
996 medium supplemented with 9  $\mu$ M RO-3306 (SIGMA SML0569) for 7 h before fixation.

997

## 998 **Immunoprecipitation and western blot**

999 The cells were collected using Trypsin and washed in PBS twice. The cell pellet was  
1000 resuspended in 10 vol. of buffer A (10 mM HEPES pH7.9, 1.5 mM MgCl<sub>2</sub>, 10 mM KCl,  
1001 1 mM DTT, 1 mM PMSF, 1x complete protease inhibitor (Roche, 04693132001) and  
1002 incubated 15 min on ice. After centrifugation at 4°C at 2000 rpm for 5 min to remove  
1003 the supernatant, the pellet was resuspended in 3 vol. of buffer A + NP40 (0.1%) and  
1004 incubated for 15 min on ice followed by another centrifugation at 4 °C 4000 rpm for  
1005 5min to remove the supernatant and resuspended in lysis buffer: (20 mM Tris pH7.5,  
1006 200 mM NaCl, 1% Triton X-100, 0.1% sodium deoxycholate, 1 mM DTT, 1 mM PMSF,  
1007 1x complete protease inhibitor (Roche, 04693132001), 1x super nuclease). The  
1008 suspension was passed through a 26GA needle 10 times, left on ice for 1 h and  
1009 centrifuged at 20000g for 30min. Proteins were quantified by Bradford (KitBiorad  
1010 5000006, spectrophotometer BIOCHROM). Each IP was performed using 1 mg of  
1011 protein in 1 ml in lysis buffer. GFP-Trap agarose beads (GTA-10, Chromotek) were  
1012 washed in lysis buffer and incubated according to the supplier's instructions with the  
1013 protein extract overnight at 4 °C. Washed five times in Lysis buffer and separated by  
1014 SDS-PAGE, imaged using Fujifilm FLA-7000 imager if Halo ligand was used and then  
1015 transferred overnight on Nitrocellulose membrane. After Ponceau red evaluation of  
1016 the transfer quality, the membrane was blocked in PBS-0,1%Tween 20 + 5% non-fatty  
1017 milk for an hour and incubated with the antibody overnight in PBS-0,1%Tween 20 +  
1018 5% non-fatty milk. Western blots were analysed using LI-COR Odyssey Fc imager.

1019

## 1020 **Antibodies list**

1021 NCAPH2: Rabbit polyclonal produced on demand by Eurogentec (WB:1/1000).

1022 SCC1: Millipore, 53A303, mouse monoclonal antibody (WB:1/1000).

- 1023 SMC2: Cell Signaling Technology, D23C5, rabbit monoclonal Antibody (WB:1/500).
- 1024 Lamin B1: Abcam Ab133741, rabbit monoclonal (WB:1/1000).
- 1025 MCPH1: Cell Signaling Technology, D38G5, rabbit monoclonal Antibody (WB:1/1000).
- 1026 CREST: Immunovision HCT0-100, human autoantibody (IF: 1/500)
- 1027 H3PS10: Millipore, clone 3H10, mouse monoclonal (WB:, IF:1/2000).
- 1028  $\gamma$ H2aX: Millipore, clone JBW301, mouse monoclonal (WB:, IF:1/500).
- 1029 CDK1: Cell Signaling Technology, cdc2, 77055, rabbit polyclonal (WB:1/1000).
- 1030 Phospho-CDK1: Cell Signaling Technology, phospho-cdc2 (Tyr15) antibody, 9111,
- 1031 rabbit polyclonal (WB:1/1000).
- 1032 WAPL: provided by J.M. Peters's Lab (WB:1/1000).
- 1033 GFP: Abcam, ab290, rabbit polyclonal (WB: 1/1000, IF:1/500).
- 1034 PK-Tag: Biorad, MCA 1360G, mouse monoclonal (WB:1/1000).
- 1035 Cyclin B1: Cell Signaling Technology, 4138T, rabbit monoclonal (IF:1/200).
- 1036 NCAPD3: Bethyl Laboratory, A300-604A-M, rabbit polyclonal (WB:1/1000).

1037

### 1038 **Halo in gel imaging**

1039 Cells were incubated with Halo-TMR ligand (100 nM) for 30 min then washed in ligand-

1040 free medium and analysed by immunofluorescence or for protein purification. After

1041 SDS-PAGE, the fluorescence was measured in the gel using an Imager Fujifilm FLA-

1042 7000.

1043

### 1044 **FRAP**

1045 Live-cell imaging was performed in a spinning disk confocal system (PerkinElmer

1046 UltraVIEW) with an EMCCD (Hamamatsu) mounted on an Olympus IX8 microscope

1047 with Olympus 60x 1.4 N.A. and 100x 1.35 N.A. objectives. Image acquisition and

1048 quantitation were performed using Volocity software. During imaging, cells were  
1049 maintained at 37°C and 5% CO<sub>2</sub> in a humidified chamber. FRAP was carried out with  
1050 a 488 nm laser beam, 100% power, 15–30 ms. The fluorescence intensity  
1051 measurement was performed by using ImageJ. All signals were subjected to  
1052 background correction. The fluorescence intensity of unbleached and bleached areas  
1053 was normalized to that of initial pre-bleaching images using the EasyFRAP website.

1054

### 1055 **In-situ Hi-C**

1056 Hi-C libraries were generated as described in <sup>68</sup>, analysed using the Juicer pipeline <sup>69</sup>  
1057 and visualised with Juicebox <sup>70</sup>. We sequenced 785,454,085 Hi-C read pairs in wild-  
1058 type mouse ES cells, yielding 509,278,039 Hi-C contacts; we also sequenced  
1059 1,814,815,287 Hi-C read pairs in *Mcp1* deleted cells, yielding 1,284,169,272 Hi-C  
1060 contacts. Loci were assigned to A and B compartments at 100 kB resolution. Loops  
1061 were called with HiCCUPS at 25 kB, 10 kB, and 5 kB resolution. Contact domains  
1062 were called at 10 kB resolution. Contact frequency analysis was performed as  
1063 described in <sup>71</sup>. All code used for these analyses is publicly available at  
1064 ([github.com/aidenlab](https://github.com/aidenlab)), with a help forum for questions at ([aidenlab.org/forum.html](https://aidenlab.org/forum.html)).

1065

### 1066 **Structured illumination microscopy**

1067 Super-resolution 3D-SIM was performed on a DeltaVision OMX SR system (GE  
1068 Healthcare) equipped with sCMOS cameras (PCO) and 405, 488 and 568 nm lasers,  
1069 using a 60x NA 1.42 PlanApo oil immersion objective (Olympus). To minimise  
1070 artefacts due to spherical aberration

1071         Raw data sets were acquired with a z-distance of 125 nm and 15 raw images  
1072 per plane (5 phases, 3 angles). Reconstructions were performed with SoftWoRx 6.2  
1073 (GE Healthcare) using channel-specifically measured optical transfer functions (OTFs)

1074 generated from 100 nm diameter green and red FluoSphere beads (ThermoFisher),  
1075 respectively, and Wiener filter set to 0.0030. For DAPI acquisitions, the sample was  
1076 excited with the 405 nm laser and the emission detected in the green channel and  
1077 reconstructed with a green OTF. This is enabled by the broad emission spectrum of  
1078 DAPI and empirically resulted in better reconstructions than reconstructing blue  
1079 emission with a 'blue' OTF obtained typically less intense blue FluoSphere beads.

1080 All data underwent quality assessment via SIMcheck <sup>72</sup> to determine image  
1081 quality via analysis of modulation contrast to noise ratio (MCNR), spherical aberration  
1082 mismatch, reconstructed Fourier plot and reconstructed intensity histogram values.  
1083 Reconstructed 32-bit 3D-SIM datasets were thresholded to the stack modal intensity  
1084 value and converted to 16-bit composite z-stacks to discard negative intensity values  
1085 using SIMcheck's "threshold and 16-bit conversion" utility and MCNR maps were  
1086 generated using the "raw data modulation contrast" tool of SIMcheck. To eliminate  
1087 false positive signals from reconstructed noise, we applied SIMcheck's 'modulation  
1088 contrast filter' utility. Briefly, this filter sets masks out all pixels, where the underlying  
1089 MCNR value in the raw data fall below an empirically chosen threshold MCNR value  
1090 of 6.0, followed by a Gaussian filter with 0.8 pixel radius (xy) to smoothen hard edges  
1091 <sup>73</sup>.

1092 Colour channels were registered in 3D with the open-source software  
1093 Chromagnon 0.85 <sup>74</sup> determining alignment parameter (x,y,z-translation, x,y,z-  
1094 magnification, and z-rotation) from a 3D-SIM dataset acquired on the date of image  
1095 acquisition of multicolour-detected 5-ethenyl-2'-deoxyuridine (EdU) pulse replication  
1096 labelled C127 mouse cells serving as biological 3D alignment calibration sample <sup>75</sup>.

1097

1098 **FACS**

1099 Cells were incubated with EdU (10  $\mu$ M) for 5 min, collected using trypsin, washed with  
1100 PBS and fixed in 3.8% Formaldehyde (Sigma-F8775) in PBS for 15 min. After three  
1101 PBS washes, cells were permeabilised in 0.5% Triton X-100 in PBS for 10 min and  
1102 then washed three times in PBS. Cells were then incubated for 20 min in blocking  
1103 buffer: PBS 3% BSA (Sigma, A4503), incubated for 1 h with H3PS10 antibody  
1104 (1/1000), washed three times in PBS and then incubated with fluorescent secondary  
1105 antibody (Alexa Fluor 488, 1/500, Life Technology) incubated with propidium iodide  
1106 (Sigma, 30  $\mu$ g/ml) and then analysed by FACS. 15,000 cells were analysed for each  
1107 data point. EdU detection was done following the manufacturer's instruction (Click-iT  
1108 EdU Imaging kit, Invitrogen).

1109

### 1110 **Protein purification**

1111 Human condensin II pentameric and tetrameric complexes were purified as previously  
1112 described<sup>59</sup>. Full length MCPH1 was cloned into the pLIB vector and viral bacmids  
1113 were generated using Tn7 transposition in DH10EMBacY cells (Geneva biotech),  
1114 transfected into Sf9 cells using Cellfectin II (GIBCO) and resultant virus harvested after  
1115 3 days. Virus was further amplified in Sf9 cells before being used to infect High Five  
1116 cells for protein expression. High Five cells were harvested by centrifugation 3 days  
1117 after infection. Cell pellets were resuspended in purification buffer (20 mM HEPES pH  
1118 8, 300 mM KCl, 5 mM MgCl<sub>2</sub>, 1 mM DTT, 10% glycerol) supplemented with 1 Pierce  
1119 protease inhibitor EDTA-free tablet (Thermo Scientific) per 50 mL and 25 U/ml of  
1120 Benzonase (Sigma) and lysed with a Dounce homogenizer followed by brief  
1121 sonication. The lysate was cleared with centrifugation, loaded onto a StrepTrap HP  
1122 (GE), washed with purification buffer and eluted with purification buffer supplemented  
1123 with 5 mM desthiobiotin (Sigma). Size exclusion chromatography was performed

1124 using purification buffer on a Superdex 200 16/60 column (GE), and protein containing  
1125 fractions separated from the void volume were pooled and concentrated.  
1126 MCPH1 residue 1-435, 1-195 and 196-435 were cloned into a pET vector with an N-  
1127 terminal 6xHis-MBP fusion tag or with an N-terminal 6xHis and C-terminal MBP tag,  
1128 and expressed in *E. coli* BL21 (DE3) pLysS cells (Novagen). Cells were grown at 37  
1129 °C, induced with 1 mM IPTG for 4 h, before being harvested by centrifugation and  
1130 flash frozen. The cell pellet was resuspended in MCPH1 purification buffer (20 mM  
1131 Tris pH 7.5, 150 mM NaCl, 10% glycerol, 1 mM DTT, Pierce protease inhibitor EDTA-  
1132 free tablet), lysed with sonication on ice, treated with Benzonase (Sigma-Aldrich) (10  
1133 µL per 100 mL, with 1 mM MgCl<sub>2</sub>) and cleared via centrifugation. Cleared cell lysate  
1134 was filtered with a 5 µm filter, imidazole was added to a final concentration of 10 mM  
1135 and incubated with pre-equilibrated His-Pure NTA resin. The resin was washed with  
1136 MCPH1 purification buffer, then washed with wash buffer 20 mM Tris pH 7.5, 500 mM  
1137 NaCl, 20 mM imidazole, before elution with 20 mM Tris pH 8, 300mM NaCl, 500 mM  
1138 Imimidazole, 10% glycerol. Protein was diluted 2-fold with buffer TA (20 mM Tris pH 8,  
1139 5% glycerol, 1 mM DTT), and loaded onto a HiTrap Q Fast Flow column or loaded on  
1140 to HiTrap Heparin HP column (GE) and eluted with a gradient of buffer TB (20 mM  
1141 Tris pH 8, 2 M NaCl, 5% glycerol, 1 mM DTT). For protein used in ATPase assays,  
1142 final size exclusion chromatography was performed using purification buffer and a  
1143 Superdex 200 10/300 or 16/60 column (GE).

1144

#### 1145 **Pull-downs**

1146 Condensin complexes (0.1 µM) were mixed with at least a 10-fold molecular excess  
1147 of MBP MCPH1 constructs or MBP protein in 200 µL and incubated with 40 µL of  
1148 Strep-tactin sepharose resin (IBA) in MCPH1 purification buffer. The resin was

1149 washed 5 times, before being eluted by boiling in 1x NuPAGE LDS sample buffer with  
1150 50 mM DTT. Samples of 10% input and resin elution were run on 4-12% NuPAGE Bis-  
1151 Tris gels against Color Prestained Protein Standard, Broad Range (NEB) and stained  
1152 with Instant Blue (Expedeon) or silver stain (Life Technology).

1153 The absence of the CAP-D3 subunit was confirmed by western blot analysis of the  
1154 output protein samples. For this, the tetrameric condensin II pull-down was run on an  
1155 SDS page gel and transferred to a nitrocellulose membrane (Amersham). The  
1156 membrane was then blocked with 5% milk-powder in TBS-T, before being probed with  
1157 a mouse anti-CAP-D3 antibody (Santa Cruz, Sc-81597, used at 1/1000), then a goat  
1158 DyLight 800 florescent anti-mouse secondary antibodies (Cell Signaling Technology,  
1159 5257, used at 1/5000). The membrane was imaged using a LI-COR imager.

1160

### 1161 **Fluorescence polarisation assays**

1162 Peptides used in fluorescence polarization assays were synthesised by Genscript and  
1163 are shown in Table 1. The concentration of 5FAM wild-type MCPH1<sub>407-422</sub> was  
1164 determined using the 5-FAM extinction coefficient of 83,000 (cmM)<sup>-1</sup> at 493 nm. Non-  
1165 labelled peptides had TFA removed to less than 1% and were accurately quantified  
1166 using Genscript's amino acid analysis service. All peptides were solubilised in DMSO  
1167 and diluted to a working concentration in FP assay buffer (20 mM Tris pH 7.5, 200 mM  
1168 NaCl, 1 mM DTT). Peptides in competition experiments were diluted in a two-fold  
1169 series with FP assay buffer supplemented with DMSO, such that DMSO concentration  
1170 was constant for all peptide concentrations.

1171

1172 Table 1: Peptides used in FP experiments

| Name | Sequence |
|------|----------|
|------|----------|



|                                |                          |
|--------------------------------|--------------------------|
| 5FAM-MCPH1 <sub>407-422</sub>  | 5FAM- CGESSYDDYFSPDNLKER |
| MCPH1 <sub>407-422</sub>       | CGESSYDDYFSPDNLKER       |
| MCPH1 <sub>407-422</sub> pS417 | CGESSYDDYF{pSER}PDNLKER  |

1173

1174 FP binding assays were performed with 0.3  $\mu$ M of 5-FAM labelled wild-type MCPH1<sub>407-</sub>  
1175 <sub>422</sub> and 0.625, 1.25, 1.75, 2.5, 3.5 and 5  $\mu$ M of pentameric condensin II or tetrameric  
1176 condensin II lacking the CAPG2 subunit, in a total volume of 40  $\mu$ l in half-area black  
1177 plates (Constar). The plate was incubated at room temperature for 20 min, before  
1178 being read with an Omega plate reader (BMG Labtech) at 5 min intervals and  
1179 monitored to ensure binding had reached equilibrium. Each plate was read three  
1180 times, and three replicates were performed at each protein concentration.

1181 FP competition titrations were performed as above, but with 0.63  $\mu$ M of condensin II,  
1182 0.3  $\mu$ M of 5FAM-MCPH1<sub>407-422</sub> and indicated amount of competing peptide. Data was  
1183 normalised by subtracting the FP signal for 5FAM-MCPH1<sub>407-422</sub> in the absence of  
1184 condensin II at each peptide concentration and divided by the background-subtracted  
1185 signal of sample with 0.63  $\mu$ M of condensin II and 0.3  $\mu$ M of 5FAM-MCPH1<sub>407-422</sub>  
1186 without any competing peptide. Each plate was read 4 times and each experiment was  
1187 performed a total of 3 times.

1188 Fluorescence polarisation data was fit using equations for direct binding and directly  
1189 competitive binding, as presented by <sup>76</sup>.

1190

### 1191 **ATPase assays**

1192 Complexes of wild type or ATPase hydrolysis deficient Q-loop mutants condensin II  
1193 with MCPH1<sub>1-435</sub>MBP were purified with gel filtration on a Superose 6 10/300 column,  
1194 along with wild-type only control in ATPase assay buffer (20 mM Tris pH 7.5, 150 mM

1195 NaCl, 1 mM DTT). Prior to gel-filtration all samples were treated with Tev protease to  
1196 remove N-terminal 6x His-tag on MCPH1<sub>1-435</sub>MBP. ATPase assays were performed  
1197 using the EnzChek™ Phosphate Assay Kit (Invitrogen) modified for a 96 well plate  
1198 format <sup>77</sup>. 50 bp double stranded DNA sequence with the same as that used in the  
1199 EMSA (without a fluorescent label). Reactions contained 50 nM protein with or without  
1200 800 nM DNA. Final conditions included 1 mM ATP and a total salt concentration of 50  
1201 mM. Protein/DNA was preincubated in reaction mix without ATP for 15 minutes at  
1202 room temperature before the reaction was started by addition of ATP immediately  
1203 before putting it in the plate reader to track phosphate release. A standard curve  
1204 ATPase rate was determined from a linear fit of data from the first 60 min.

1205

#### 1206 **Electromobility shift assays**

1207 EMSAs were performed using 50 nM of 50 bp double stranded DNA labelled with Cy5  
1208 at the 5' with the sequence:

1209 CTGTCACACCCTGTCACACCCTGTCACACCCTGTCACACCCTGTCACACC

1210 For MCPH1 EMSAs, MCPH1-MBP constructs were diluted in 20 mM Tris pH 7.5, 150  
1211 mM NaCl, 10% glycerol, 1 mM DTT and mixed 1 in 2 with DNA in 20 mM HEPES pH  
1212 8, 300 mM KCl, 5 mM MgCl<sub>2</sub>, 10% glycerol and 1 mM DTT.

1213 For condensin II/MCPH1 EMSAs, condensin II diluted in 20 mM HEPES pH 8, 300  
1214 mM KCl, 5 mM MgCl<sub>2</sub>, 10% glycerol and 1 mM DTT and mixed with MCPH1<sub>1-435</sub>-MBP,  
1215 MBP or 5-FAM-MCPH1<sub>407-424</sub> diluted in in 20 mM Tris pH 7.5, 150mM NaCl, 10%  
1216 glycerol, 1 mM DTT. DNA was then added to a final concentration of 50 nM. Protein  
1217 and DNA were incubated on ice for 15 min, before being loaded in a 2% agarose gel  
1218 and run in 0.5x TBE buffer for 30 min. Gel was imaged using a Typhoon.

1219 **REFERENCES**

- 1220 1. Yatskevich, S., Rhodes, J. & Nasmyth, K. Organization of Chromosomal DNA  
1221 by SMC Complexes. *Annu. Rev. Genet.* **53**, 445–482 (2019).
- 1222 2. Tedeschi, A. *et al.* Wapl is an essential regulator of chromatin structure and  
1223 chromosome segregation. *Nature* **501**, 564–568 (2013).
- 1224 3. Challa, K. *et al.* Meiosis-specific prophase-like pathway controls cleavage-  
1225 independent release of cohesin by Wapl phosphorylation. *bioRxiv* 1–27 (2018)  
1226 doi:10.1101/250589.
- 1227 4. Hill, L. *et al.* Wapl repression by Pax5 promotes V gene recombination by Igh  
1228 loop extrusion. *Nature* **584**, 142–147 (2020).
- 1229 5. Davidson, I. F. *et al.* DNA loop extrusion by human cohesin. *Science (80-. )*.  
1230 **366**, 1338–1345 (2019).
- 1231 6. Ganji, M. *et al.* Real-time imaging of DNA loop extrusion by condensin.  
1232 *Science (80-. )*. **360**, 102–105 (2018).
- 1233 7. Wutz, G. *et al.* ESCO1 and CTCF enable formation of long chromatin loops by  
1234 protecting cohesin<sup>1</sup> from WAPL. *Elife* **9**, 1–33 (2020).
- 1235 8. Gerlich, D., Hirota, T., Koch, B., Peters, J. M. & Ellenberg, J. Condensin I  
1236 stabilizes chromosomes mechanically through a dynamic interaction in live  
1237 cells. *Curr. Biol.* **16**, 333–344 (2006).
- 1238 9. Hansen, A. S., Pustova, I., Cattoglio, C., Tjian, R. & Darzacq, X. CTCF and  
1239 cohesin regulate chromatin loop stability with distinct dynamics. *Elife* **6**, 1–33  
1240 (2017).
- 1241 10. Cutts, E. E. & Vannini, A. Condensin complexes: understanding loop extrusion  
1242 one conformational change at a time. *Biochem. Soc. Trans.* **48**, 2089–2100  
1243 (2020).

- 1244 11. Hirota, T., Gerlich, D., Koch, B., Ellenberg, J. & Peters, J. M. Distinct functions  
1245 of condensin I and II in mitotic chromosome assembly. *J. Cell Sci.* **117**, 6435–  
1246 6445 (2004).
- 1247 12. Ono, T. *et al.* Differential contributions of condensin I and condensin II to  
1248 mitotic chromosome architecture in vertebrate cells. *Cell* **115**, 109–121 (2003).
- 1249 13. Ono, T., Fang, Y., Spector, D. L. & Hirano, T. Spatial and Temporal Regulation  
1250 of Condensins I and II in Mitotic Chromosome Assembly in Human Cells. *Mol.*  
1251 *Biol. Cell* **15**, 3296–3308 (2004).
- 1252 14. Walther, N. *et al.* A quantitative map of human Condensins provides new  
1253 insights into mitotic chromosome architecture. *J. Cell Biol.* **217**, 2309–2328  
1254 (2018).
- 1255 15. Gibcus, J. H. *et al.* A pathway for mitotic chromosome formation. *Science* (80-  
1256 ). **359**, (2018).
- 1257 16. Baxter, J. & Aragón, L. A model for chromosome condensation based on the  
1258 interplay between condensin and topoisomerase II. *Trends Genet.* **28**, 110–  
1259 117 (2012).
- 1260 17. Elbatsh, A. M. O. *et al.* Cohesin Releases DNA through Asymmetric ATPase-  
1261 Driven Ring Opening. *Mol. Cell* **61**, 575–588 (2016).
- 1262 18. Beckouët, F. *et al.* Releasing Activity Disengages Cohesin's Smc3/Scc1  
1263 Interface in a Process Blocked by Acetylation. *Mol. Cell* **61**, 563–574 (2016).
- 1264 19. Chan, K. L. *et al.* Cohesin's DNA exit gate is distinct from its entrance gate and  
1265 is regulated by acetylation. *Cell* **150**, 961–974 (2012).
- 1266 20. Gligoris, T. G. *et al.* Closing the cohesin ring: Structure and function of its  
1267 Smc3-kleisin interface. *Science* (80- ). **346**, 963–967 (2014).
- 1268 21. Hassler, M. *et al.* Structural Basis of an Asymmetric Condensin ATPase Cycle.

- 1269 *Mol. Cell* **74**, 1175-1188.e9 (2019).
- 1270 22. Lee, B. G. *et al.* Cryo-EM structures of holo condensin reveal a subunit flip-flop  
1271 mechanism. *Nat. Struct. Mol. Biol.* **27**, 743–751 (2020).
- 1272 23. Buheitel, J. & Stemmann, O. Prophase pathway-dependent removal of cohesin  
1273 from human chromosomes requires opening of the Smc3-Scc1 gate. *EMBO J.*  
1274 **32**, 666–676 (2013).
- 1275 24. Huis In't Veld, P. J. *et al.* Characterization of a DNA exit gate in the human  
1276 cohesin ring. *Science (80-. )*. **346**, 968–972 (2014).
- 1277 25. Ono, T., Yamashita, D. & Hirano, T. Condensin II initiates sister chromatid  
1278 resolution during S phase. *J. Cell Biol.* **200**, 429–441 (2013).
- 1279 26. Schwarzer, W. *et al.* Two independent modes of chromatin organization  
1280 revealed by cohesin removal. *Nature* **551**, 51–56 (2017).
- 1281 27. Abe, S. *et al.* The initial phase of chromosome condensation requires Cdk1-  
1282 mediated phosphorylation of the CAP-D3 subunit of condensin II. *Genes Dev.*  
1283 **25**, 863–874 (2011).
- 1284 28. Woods, C. G., Bond, J. & Enard, W. Autosomal recessive primary  
1285 microcephaly (MCPH): A review of clinical, molecular, and evolutionary  
1286 findings. *Am. J. Hum. Genet.* **76**, 717–728 (2005).
- 1287 29. Thornton, G. K. & Woods, C. G. Primary microcephaly: do all roads lead to  
1288 Rome? *Trends Genet.* **25**, 501–510 (2009).
- 1289 30. Neitzel, H. *et al.* Premature chromosome condensation in humans associated  
1290 with microcephaly and mental retardation: A novel autosomal recessive  
1291 condition. *Am. J. Hum. Genet.* **70**, 1015–1022 (2002).
- 1292 31. Trimborn, M. *et al.* Mutations in microcephalin cause aberrant regulation of  
1293 chromosome condensation. *Am. J. Hum. Genet.* **75**, 261–266 (2004).

- 1294 32. Trimborn, M., Schindler, D., Neitzel, H. & Hirano, T. Misregulated chromosome  
1295 condensation in MCPH1 primary microcephaly is mediated by condensin II.  
1296 *Cell Cycle* **5**, 322–326 (2006).
- 1297 33. Yamashita, D. *et al.* MCPH1 regulates chromosome condensation and shaping  
1298 as a composite modulator of condensin II. *J. Cell Biol.* **194**, 841–854 (2011).
- 1299 34. Arroyo, M. *et al.* MCPH1 is essential for cellular adaptation to the G2-phase  
1300 decatenation checkpoint. *FASEB J.* **33**, 8363–8374 (2019).
- 1301 35. Arroyo, M. *et al.* MCPH1, mutated in primary microcephaly, is required for  
1302 efficient chromosome alignment during mitosis. *Sci. Rep.* **7**, 1–12 (2017).
- 1303 36. Venkatesh, T. & Suresh, P. S. Emerging roles of MCPH1: Expedition from  
1304 primary microcephaly to cancer. *Eur. J. Cell Biol.* **93**, 98–105 (2014).
- 1305 37. Leung, J. W. *et al.* SET nuclear oncogene associates with  
1306 microcephalin/MCPH1 and regulates chromosome condensation. *J. Biol.*  
1307 *Chem.* **286**, 21393–21400 (2011).
- 1308 38. Cicconi, A. *et al.* Microcephalin 1/BRIT1-TRF2 interaction promotes telomere  
1309 replication and repair, linking telomere dysfunction to primary microcephaly.  
1310 *Nat. Commun.* **11**, (2020).
- 1311 39. Lin, S. Y. & Elledge, S. J. Multiple tumor suppressor pathways negatively  
1312 regulate telomerase. *Cell* **113**, 881–889 (2003).
- 1313 40. Alderton, G. K. *et al.* Regulation of mitotic entry by microcephalin and its  
1314 overlap with ATR signalling. *Nat. Cell Biol.* **8**, 725–733 (2006).
- 1315 41. Gruber, R. *et al.* MCPH1 regulates the neuroprogenitor division mode by  
1316 coupling the centrosomal cycle with mitotic entry through the Chk1-Cdc25  
1317 pathway. *Nat. Cell Biol.* **13**, 1325–1334 (2011).
- 1318 42. Chang, H. Y. *et al.* Microcephaly family protein MCPH1 stabilizes RAD51

- 1319 filaments. *Nucleic Acids Res.* **48**, 9135–9146 (2020).
- 1320 43. Tibelius, A. *et al.* Microcephalin and pericentrin regulate mitotic entry via  
1321 centrosome-associated Chk1. *J. Cell Biol.* **185**, 1149–1157 (2009).
- 1322 44. Buster, D. W. *et al.* SCFSlimb ubiquitin ligase suppresses condensin II-  
1323 mediated nuclear reorganization by degrading Cap-H2. *J. Cell Biol.* **201**, 49–63  
1324 (2013).
- 1325 45. Nguyen, H. Q. *et al.* Drosophila Casein Kinase I Alpha Regulates Homolog  
1326 Pairing and Genome Organization by Modulating Condensin II Subunit Cap-H2  
1327 Levels. *PLoS Genet.* **11**, 1–32 (2015).
- 1328 46. Berezin, C. *et al.* ConSeq: The identification of functionally and structurally  
1329 important residues in protein sequences. *Bioinformatics* **20**, 1322–1324  
1330 (2004).
- 1331 47. Ashkenazy, H. *et al.* ConSurf 2016: an improved methodology to estimate and  
1332 visualize evolutionary conservation in macromolecules. *Nucleic Acids Res.* **44**,  
1333 W344–W350 (2016).
- 1334 48. Van Roey, K. *et al.* Short linear motifs: Ubiquitous and functionally diverse  
1335 protein interaction modules directing cell regulation. *Chem. Rev.* **114**, 6733–  
1336 6778 (2014).
- 1337 49. Oppermann, F. S. *et al.* Combination of chemical genetics and  
1338 phosphoproteomics for kinase signaling analysis enables confident  
1339 identification of cellular downstream targets. *Mol. Cell. Proteomics* **11**, 1–12  
1340 (2012).
- 1341 50. Errico, A., Deshmukh, K., Tanaka, Y., Pozniakovsky, A. & Hunt, T.  
1342 Identification of substrates for cyclin dependent kinases. *Adv. Enzyme Regul.*  
1343 **50**, 375–399 (2010).

- 1344 51. Rai, R. *et al.* BRIT1 regulates early DNA damage response, chromosomal  
1345 integrity, and cancer. *Cancer Cell* **10**, 145–157 (2006).
- 1346 52. Houlard, M. *et al.* Condensin confers the longitudinal rigidity of chromosomes.  
1347 *Nat. Cell Biol.* **17**, 771–781 (2015).
- 1348 53. Eichinger, C. S., Kurze, A., Oliveira, R. A. & Nasmyth, K. Disengaging the  
1349 Smc3/kleisin interface releases cohesin from Drosophila chromosomes during  
1350 interphase and mitosis. *EMBO J.* **32**, 656–665 (2013).
- 1351 54. Wood, J. L., Liang, Y., Li, K. & Chen, J. Microcephalin/MCPH1 associates with  
1352 the condensin II complex to function in homologous recombination repair. *J.*  
1353 *Biol. Chem.* **283**, 29586–29592 (2008).
- 1354 55. Li, Y. *et al.* The structural basis for cohesin–CTCF-anchored loops. *Nature*  
1355 **578**, 472–476 (2020).
- 1356 56. Chan, K. L. *et al.* Pds5 promotes and protects cohesin acetylation. *Proc. Natl.*  
1357 *Acad. Sci. U. S. A.* **110**, 13020–13025 (2013).
- 1358 57. Srinivasan, M. *et al.* Scc2 counteracts a wapl-independent mechanism that  
1359 releases cohesin from chromosomes during G1. *Elife* **8**, 1–34 (2019).
- 1360 58. Lee, B. G. *et al.* Cryo-EM structures of holo condensin reveal a subunit flip-flop  
1361 mechanism. *Nat. Struct. Mol. Biol.* **27**, 743–751 (2020).
- 1362 59. Kong, M. *et al.* Human Condensin I and II Drive Extensive ATP-Dependent  
1363 Compaction of Nucleosome-Bound DNA. *Mol. Cell* **79**, 99-114.e9 (2020).
- 1364 60. Golfier, S., Quail, T., Kimura, H. & Brugués, J. Cohesin and condensin extrude  
1365 DNA loops in a cell-cycle dependent manner. *Elife* **9**, 1–34 (2020).
- 1366 61. Kim, Y., Shi, Z., Zhang, H., Finkelstein, I. J. & Yu, H. Human cohesin compacts  
1367 DNA by loop extrusion. *Science (80-. ).* **366**, 1345–1349 (2019).
- 1368 62. Collier, J. E. *et al.* Transport of DNA within cohesin involves clamping on top of



- 1369 engaged heads by SCC2 and entrapment within the ring by SCC3. *Elife* **9**, 1–  
1370 36 (2020).
- 1371 63. Higashi, T. L. *et al.* A Structure-Based Mechanism for DNA Entry into the  
1372 Cohesin Ring. *Mol. Cell* **79**, 917-933.e9 (2020).
- 1373 64. Shi, Z., Gao, H., Bai, X. & Yu, H. Cryo-EM structure of the human cohesin-  
1374 NIPBL-DNA complex. **1459**, 1454–1459 (2020).
- 1375 65. Rao, S. S. P. *et al.* Cohesin Loss Eliminates All Loop Domains. *Cell* **171**, 305-  
1376 320.e24 (2017).
- 1377 66. Ran, F. A. *et al.* Genome engineering using the CRISPR-Cas9 system. *Nat.*  
1378 *Protoc.* **8**, 2281–2308 (2013).
- 1379 67. Grimm, J. B. *et al.* A General Method to Improve Fluorophores Using  
1380 Deuterated Auxochromes. *JACS Au* **1**, 690–696 (2021).
- 1381 68. Rao, S. S. P. *et al.* A 3D map of the human genome at kilobase resolution  
1382 reveals principles of chromatin looping. *Cell* **159**, 1665–1680 (2014).
- 1383 69. Durand, N. C. *et al.* Juicer Provides a One-Click System for Analyzing Loop-  
1384 Resolution Hi-C Experiments. *Cell Syst.* **3**, 95–98 (2016).
- 1385 70. Durand, N. C. *et al.* Juicebox Provides a Visualization System for Hi-C Contact  
1386 Maps with Unlimited Zoom. *Cell Syst.* **3**, 99–101 (2016).
- 1387 71. Sanborn, A. L. *et al.* Chromatin extrusion explains key features of loop and  
1388 domain formation in wild-type and engineered genomes. *Proc. Natl. Acad. Sci.*  
1389 *U. S. A.* **112**, E6456–E6465 (2015).
- 1390 72. Ball, G. *et al.* SIMcheck: A toolbox for successful super-resolution structured  
1391 illumination microscopy. *Sci. Rep.* **5**, 1–12 (2015).
- 1392 73. Rodermund, L. *et al.* Time-resolved structured illumination microscopy reveals  
1393 key principles of Xist RNA spreading. *Science (80-. ).* **372**, eabe7500 (2021).

- 1394 74. Matsuda, A., Schermelleh, L., Hirano, Y., Haraguchi, T. & Hiraoka, Y. Accurate  
1395 and fiducial-marker-free correction for three-dimensional chromatic shift in  
1396 biological fluorescence microscopy. *Sci. Rep.* **8**, 1–3 (2018).
- 1397 75. Kraus, F. *et al.* Quantitative 3D structured illumination microscopy of nuclear  
1398 structures. *Nat. Protoc.* **12**, 1011–1028 (2017).
- 1399 76. Roehrl, M. H. A., Wang, J. Y. & Wagner, G. A general framework for  
1400 development and data analysis of competitive high-throughput screens for  
1401 small-molecule inhibitors of protein-protein interactions by fluorescence  
1402 polarization. *Biochemistry* **43**, 16056–16066 (2004).
- 1403 77. Voulgaris, M. & Gligoris, T. G. A protocol for assaying the ATPase activity of  
1404 recombinant cohesin holocomplexes. *Methods Mol. Biol.* **2004**, 197–208  
1405 (2019).
- 1406

Figure 1

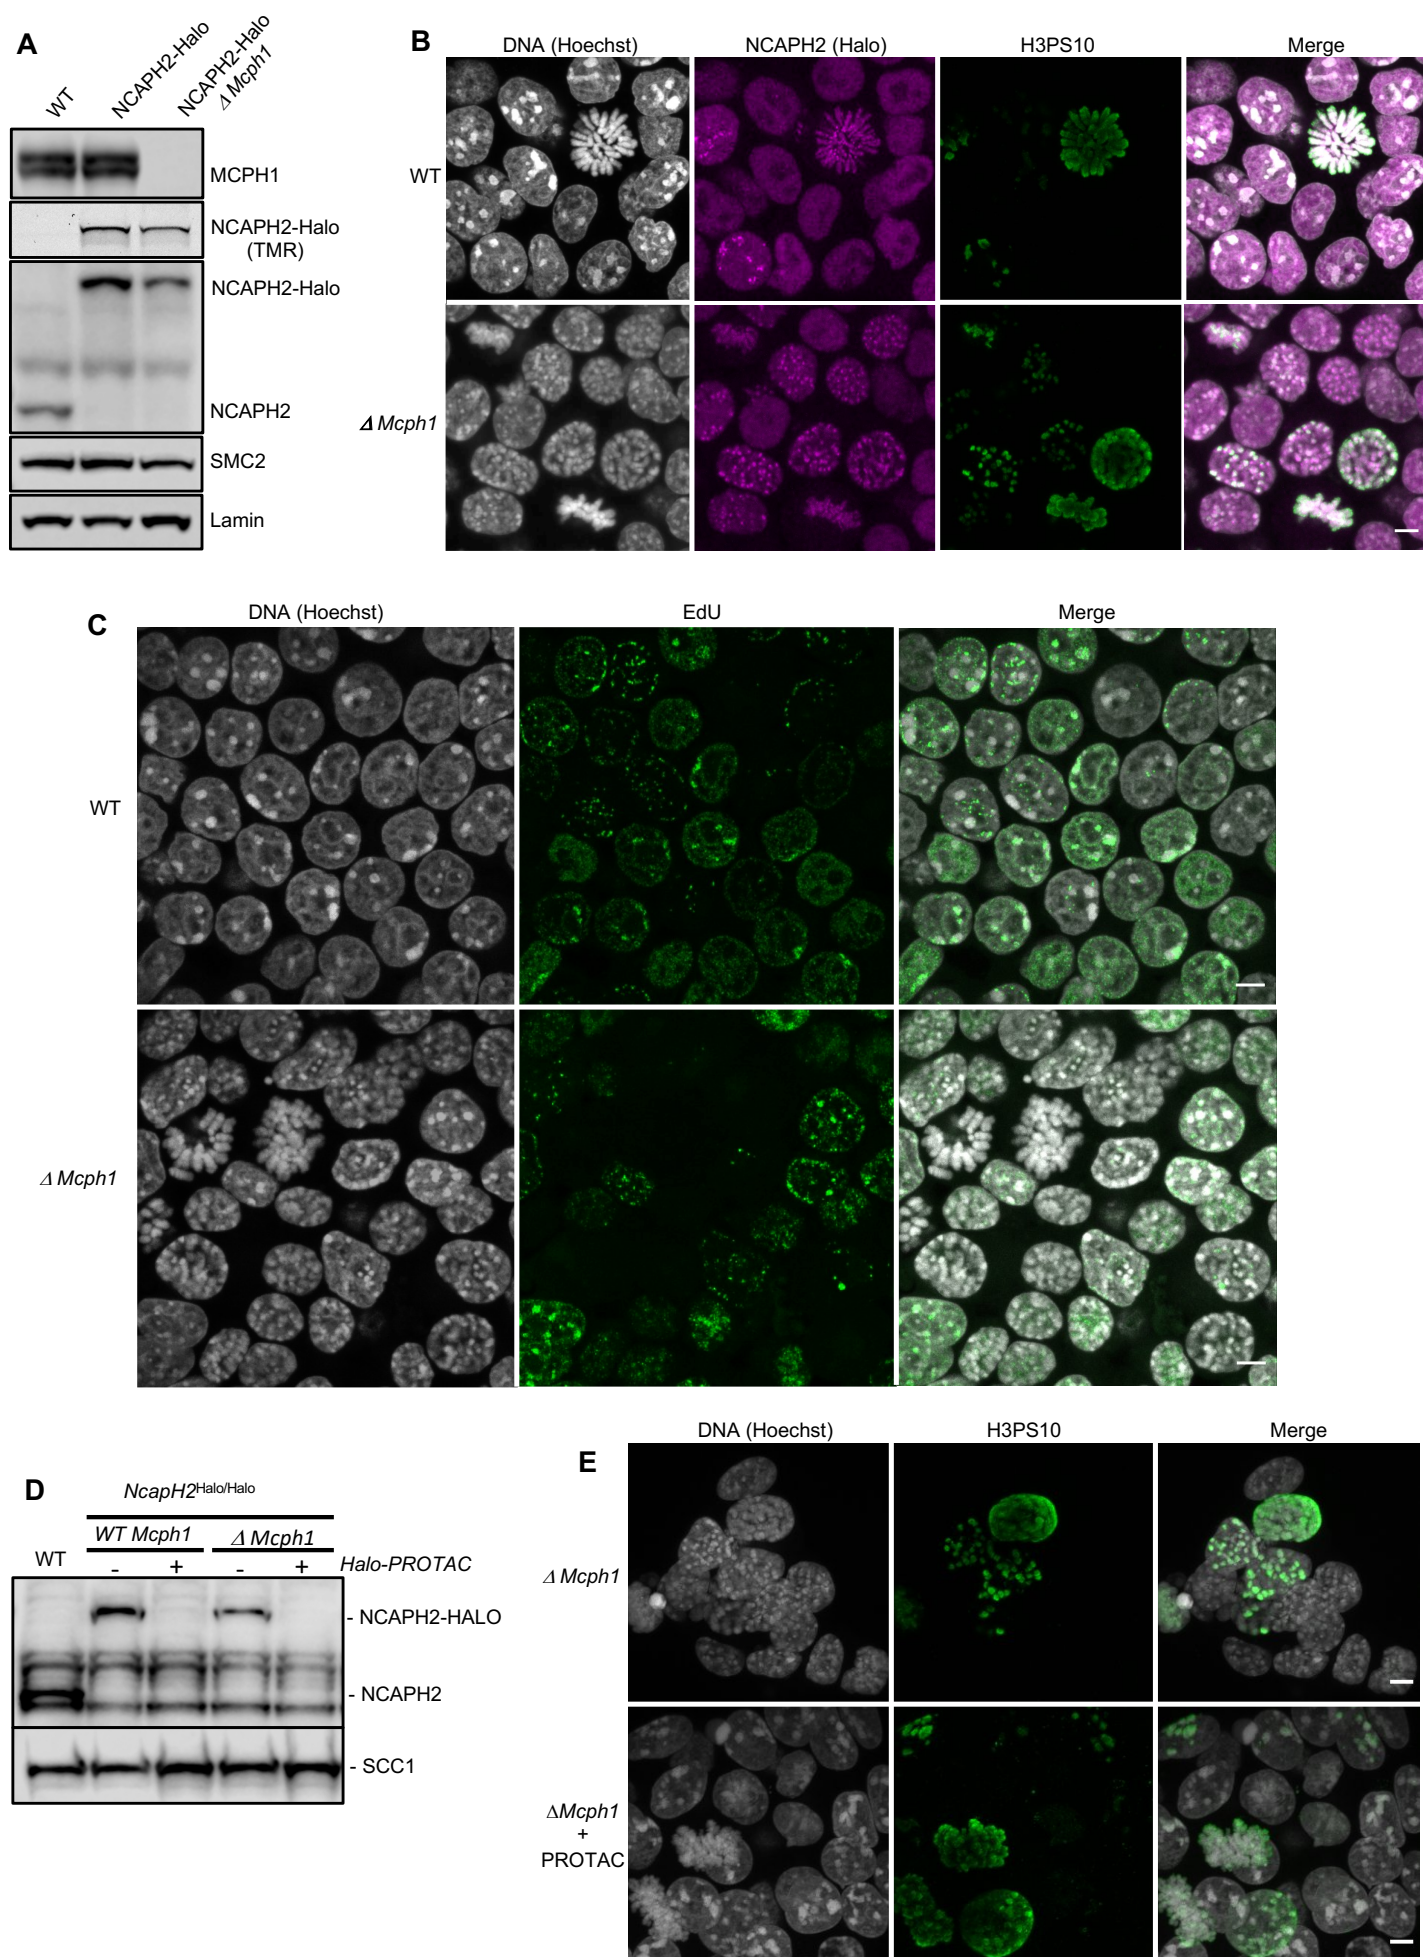

Figure 2

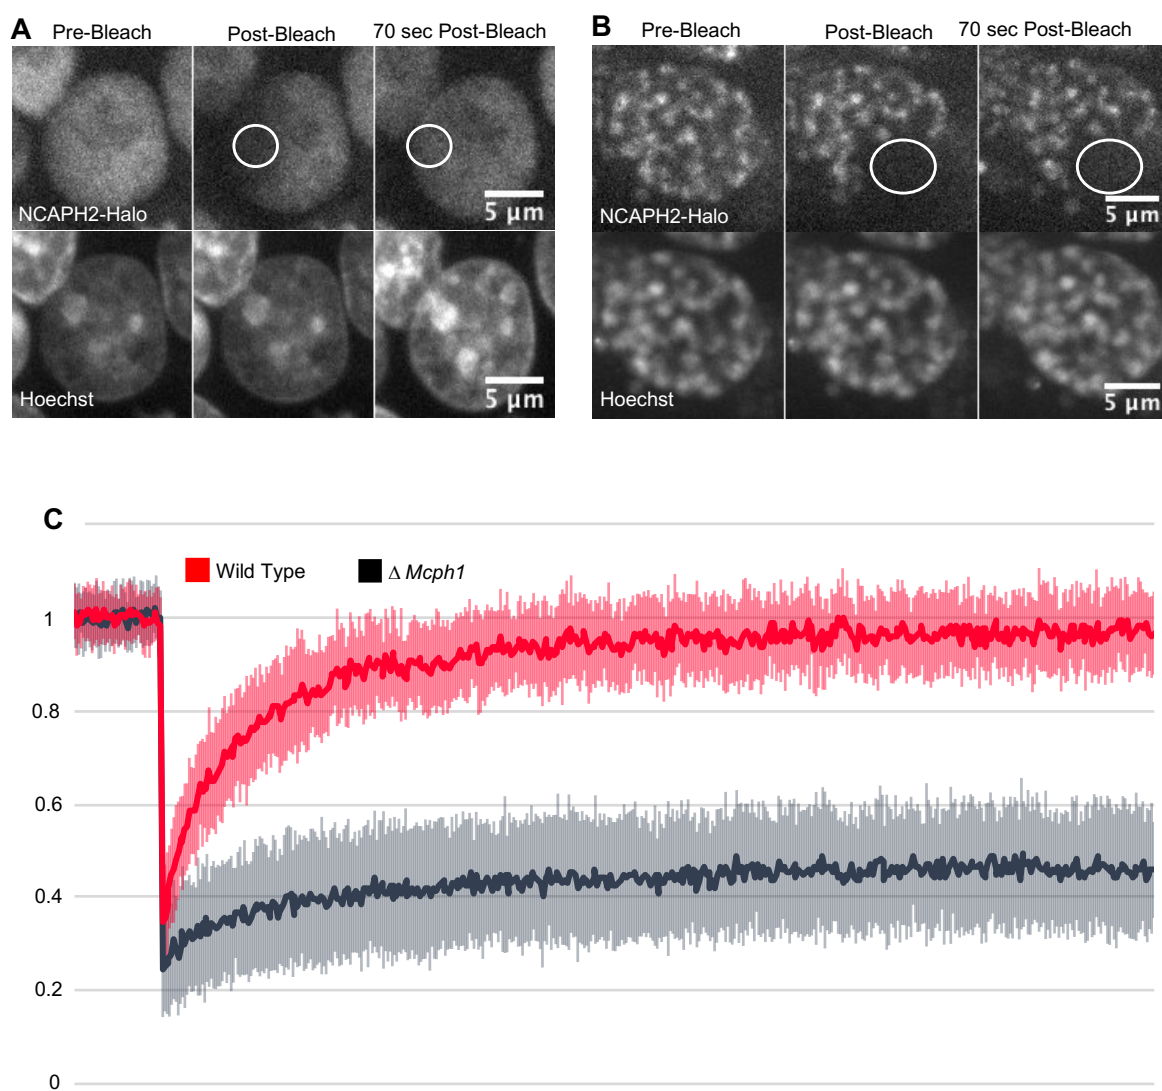

## Figure 3

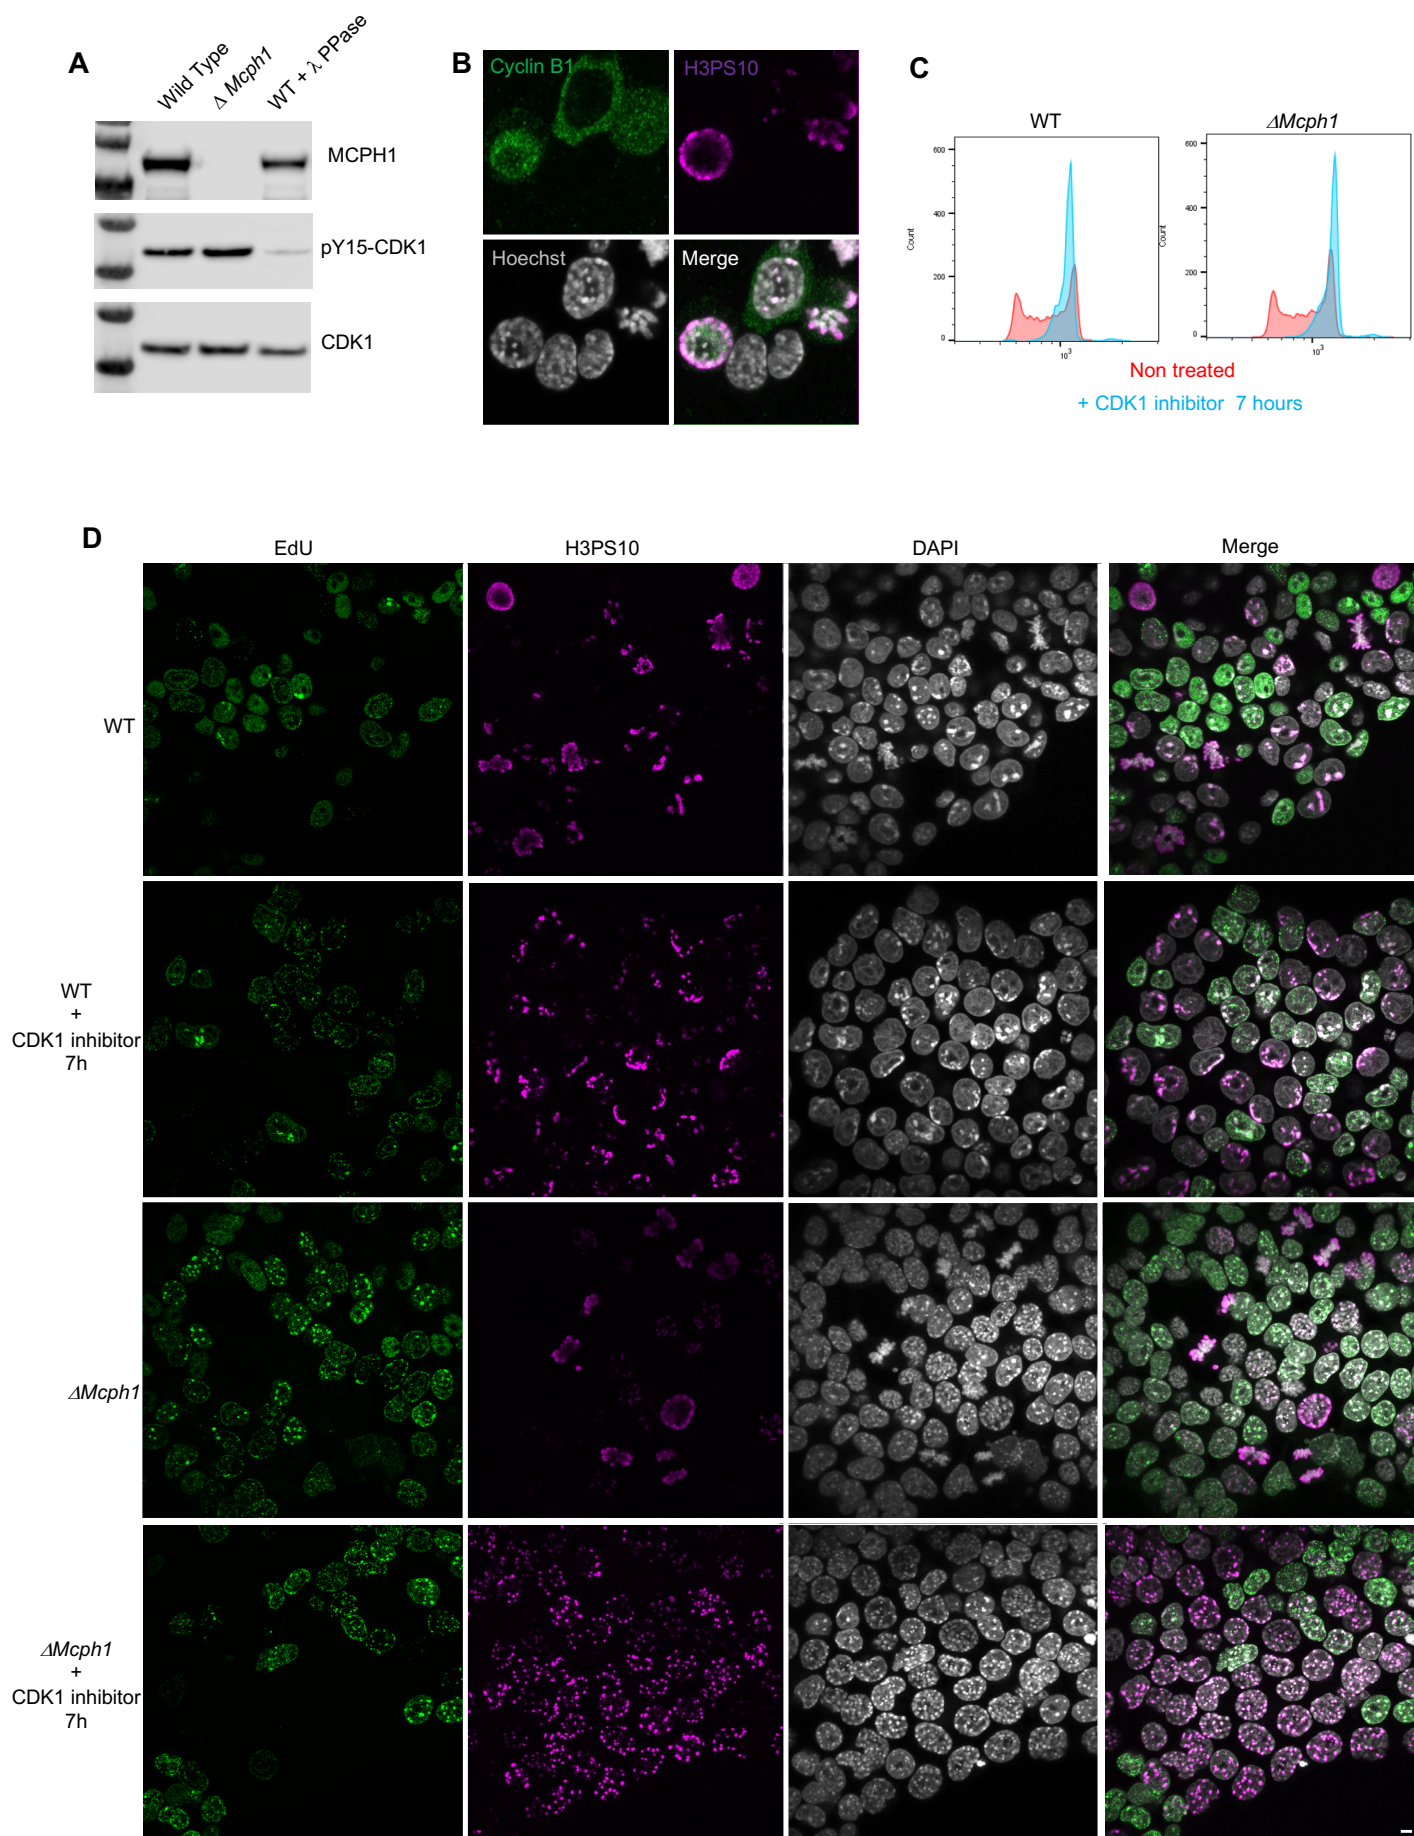

Figure 4

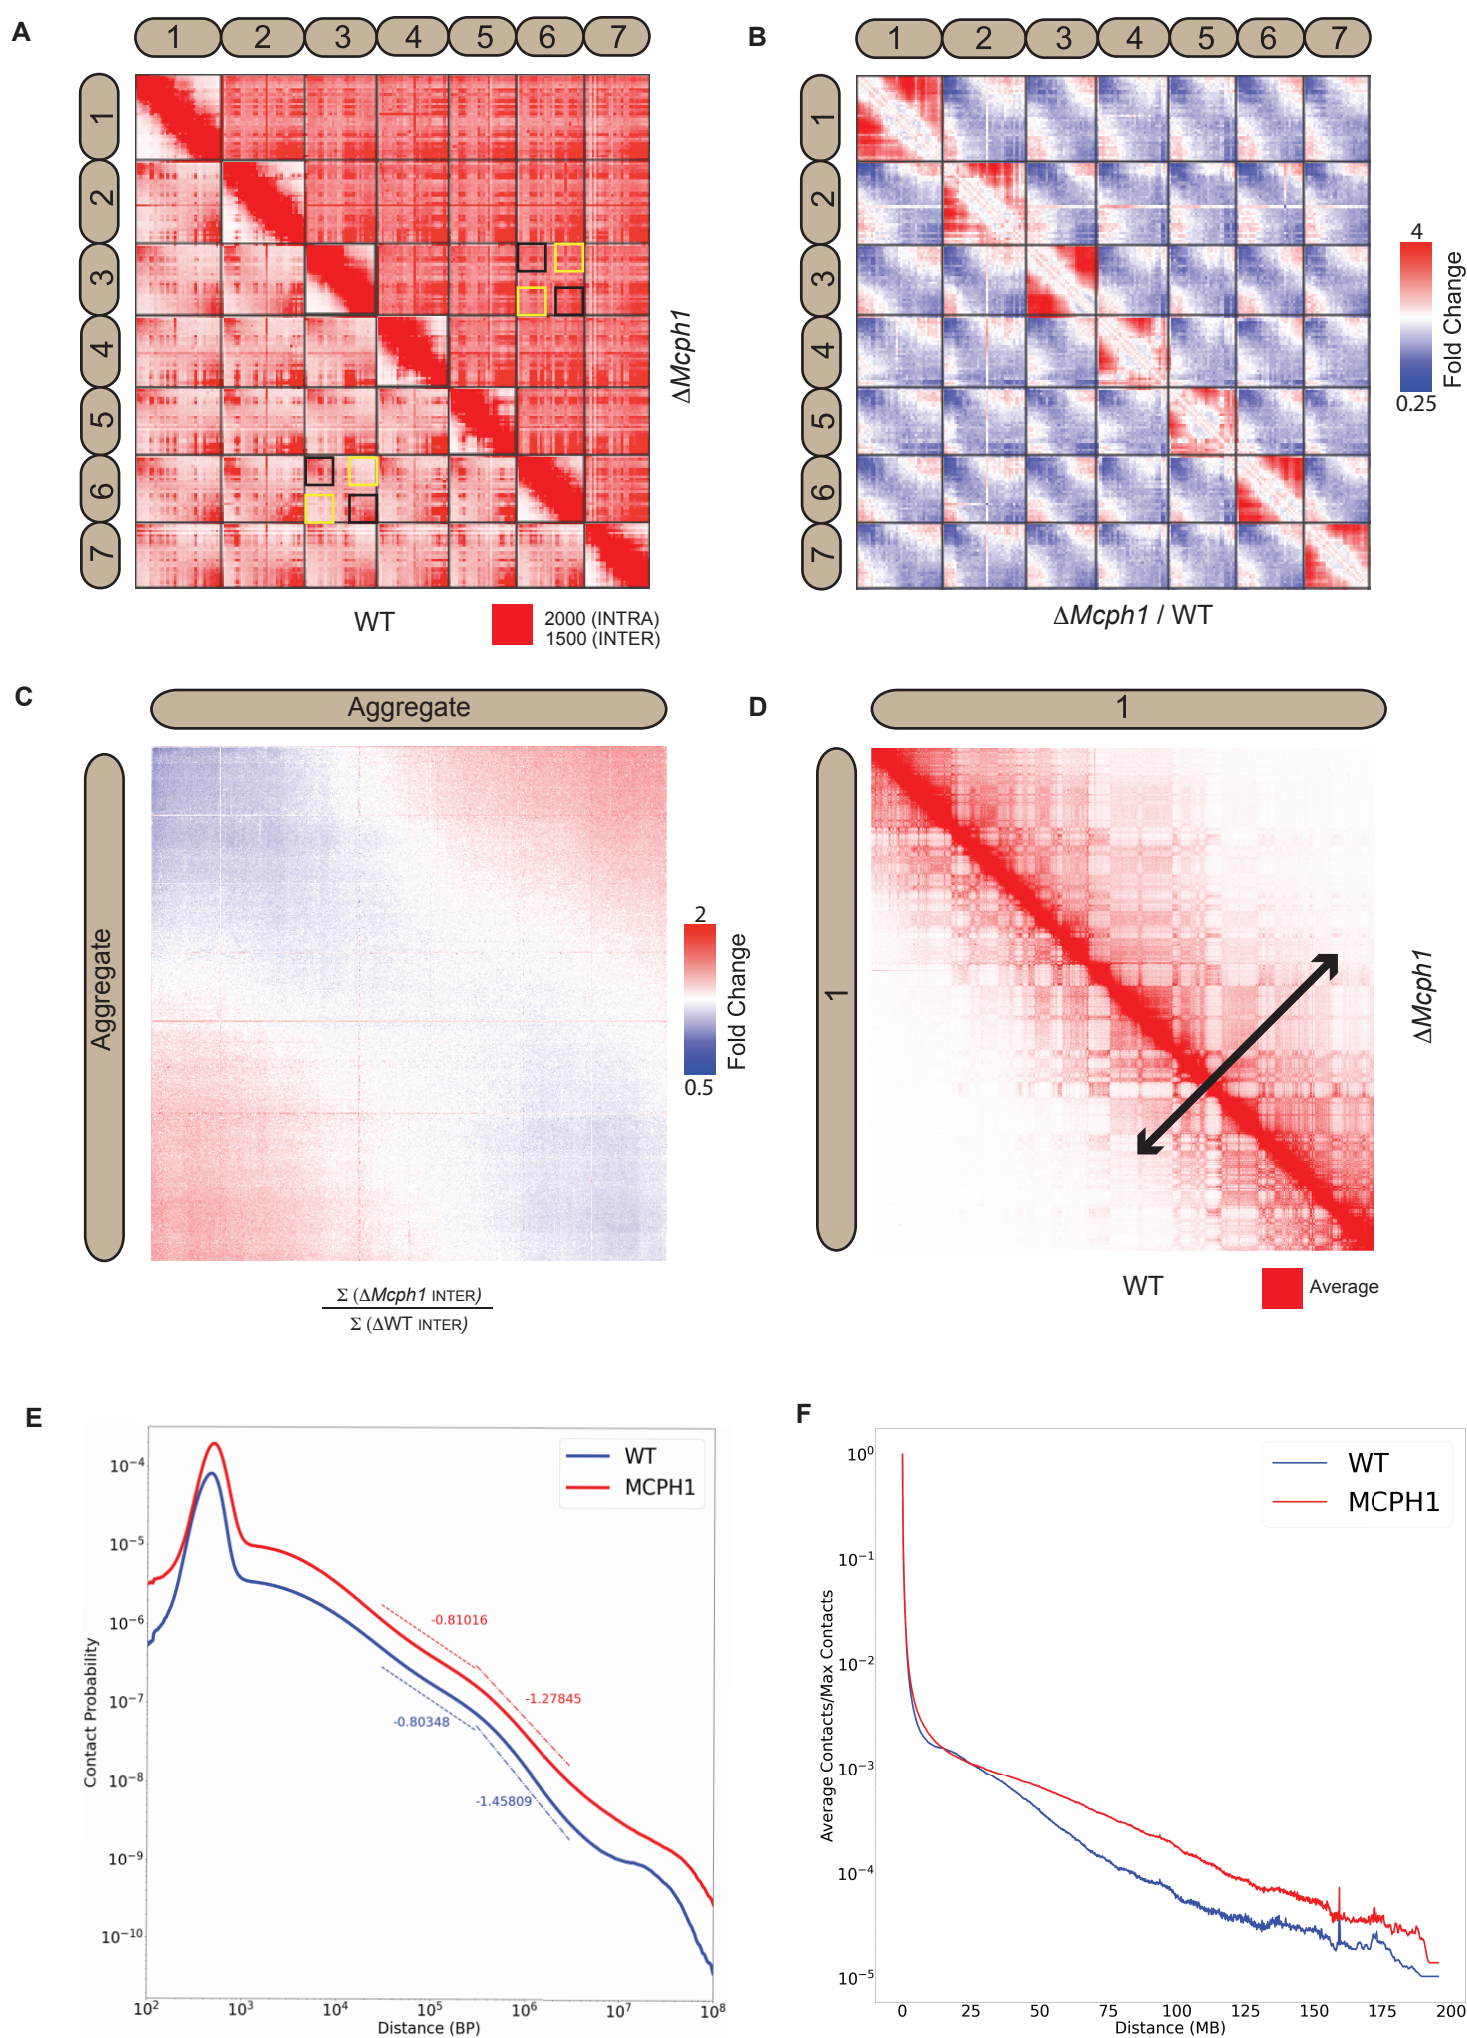

Figure 5

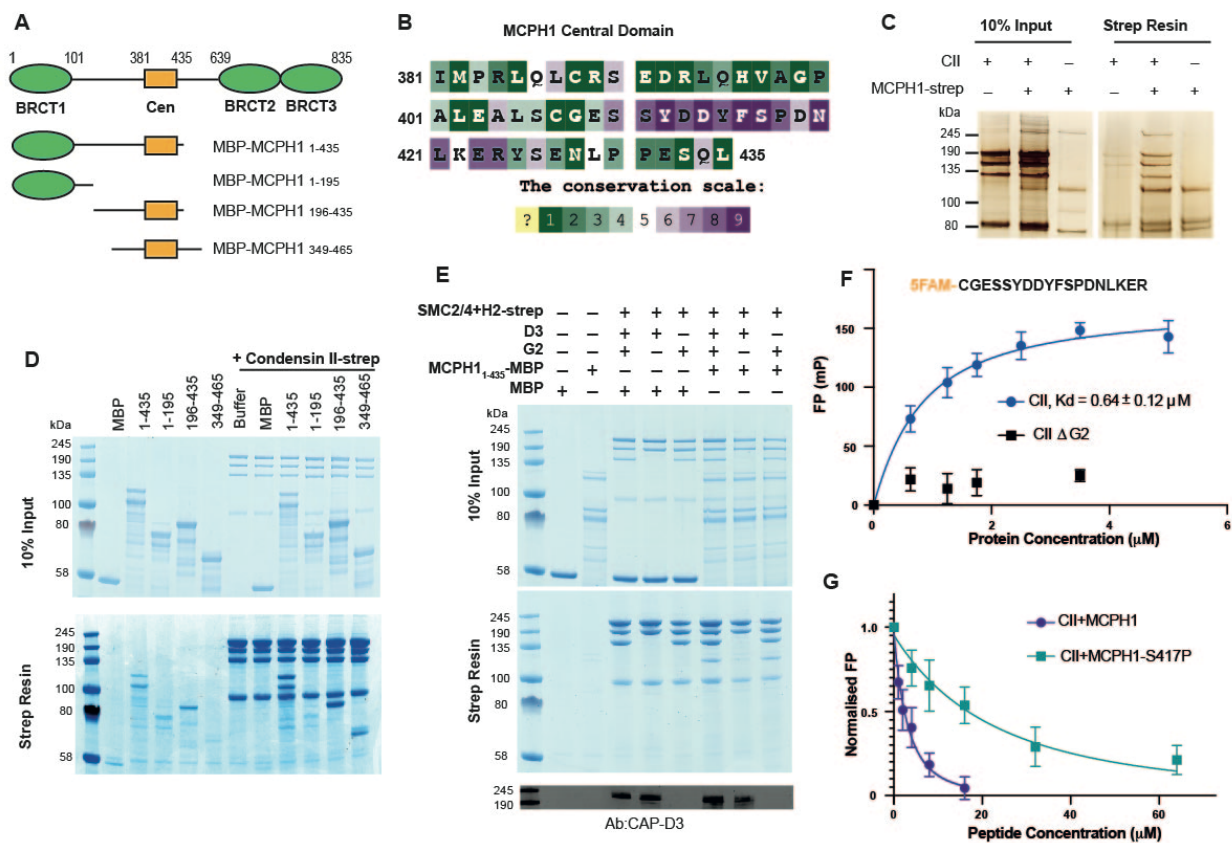

Figure 6

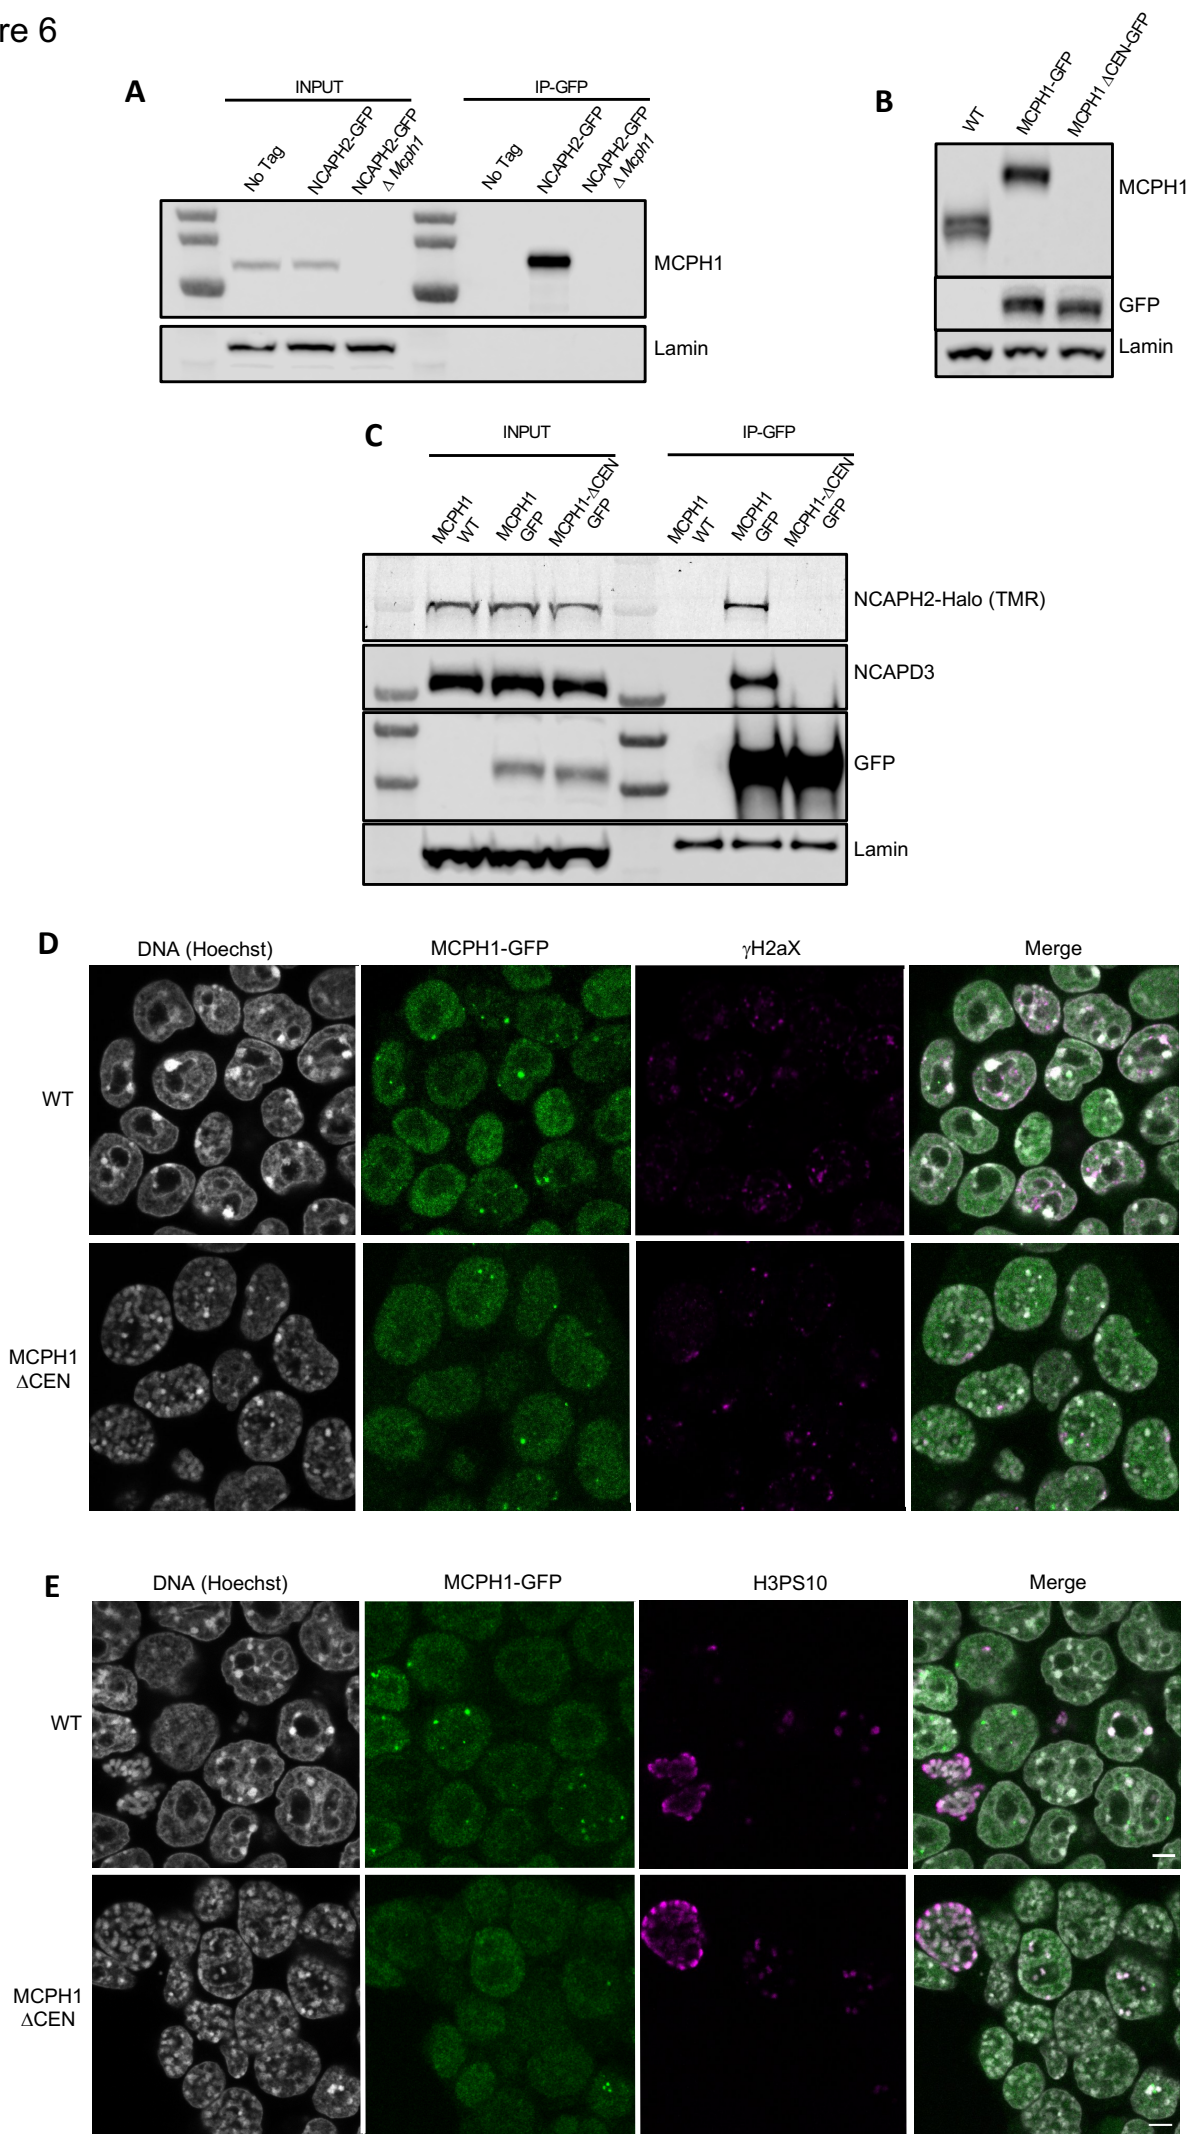



Figure 7

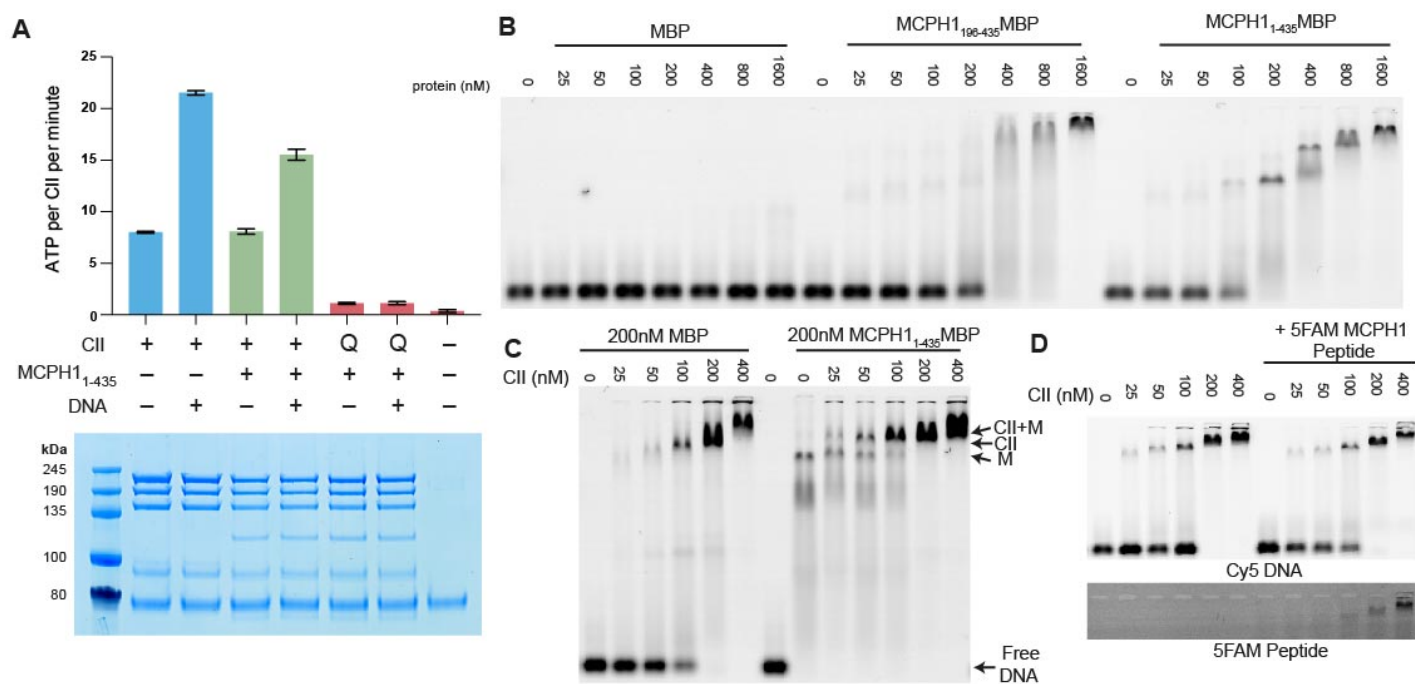

Figure 8

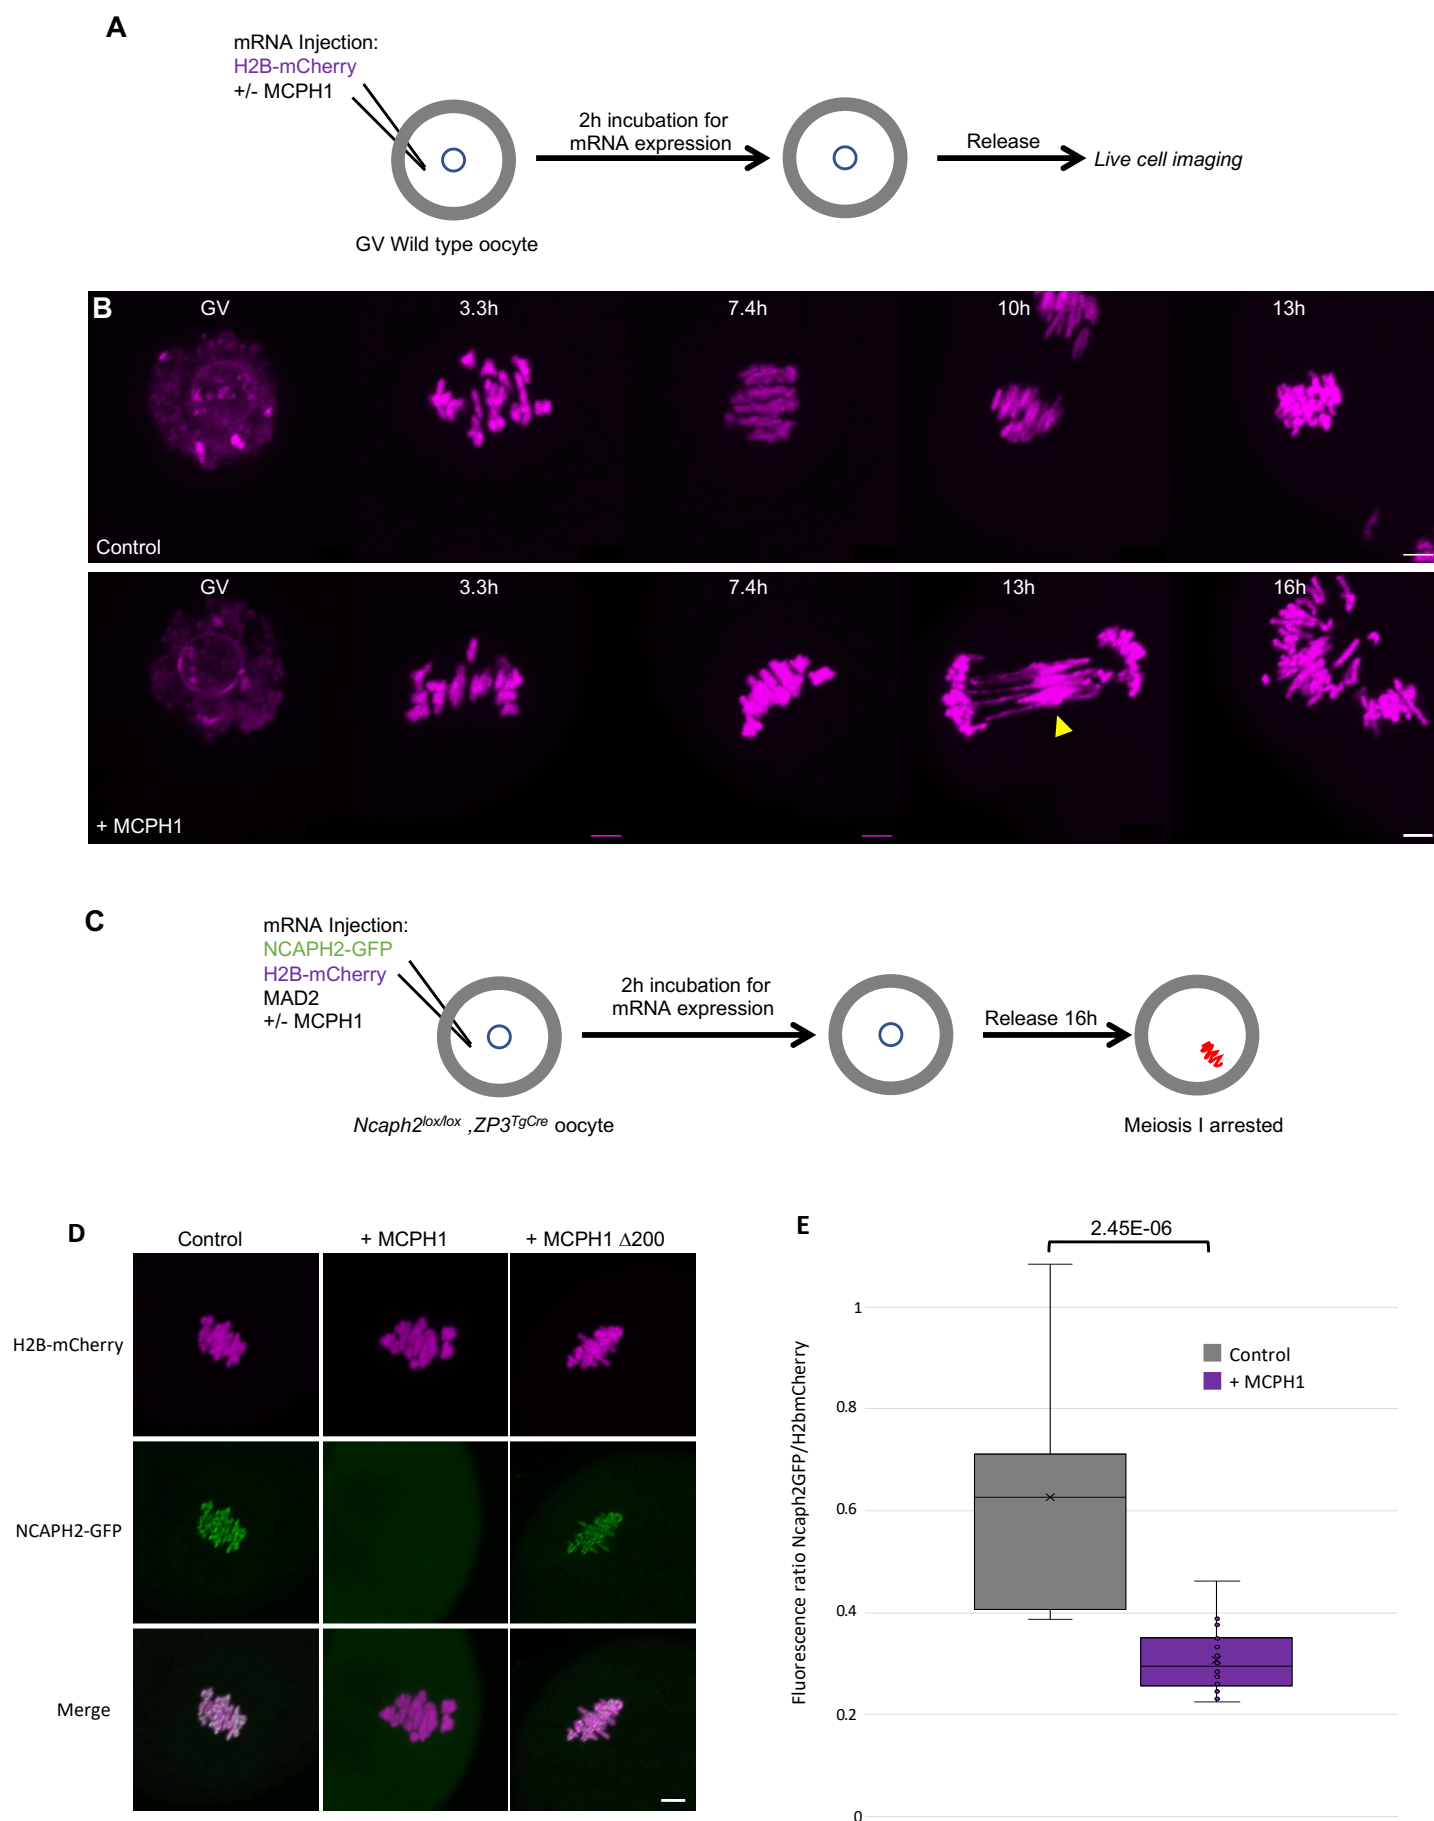

Figure 9

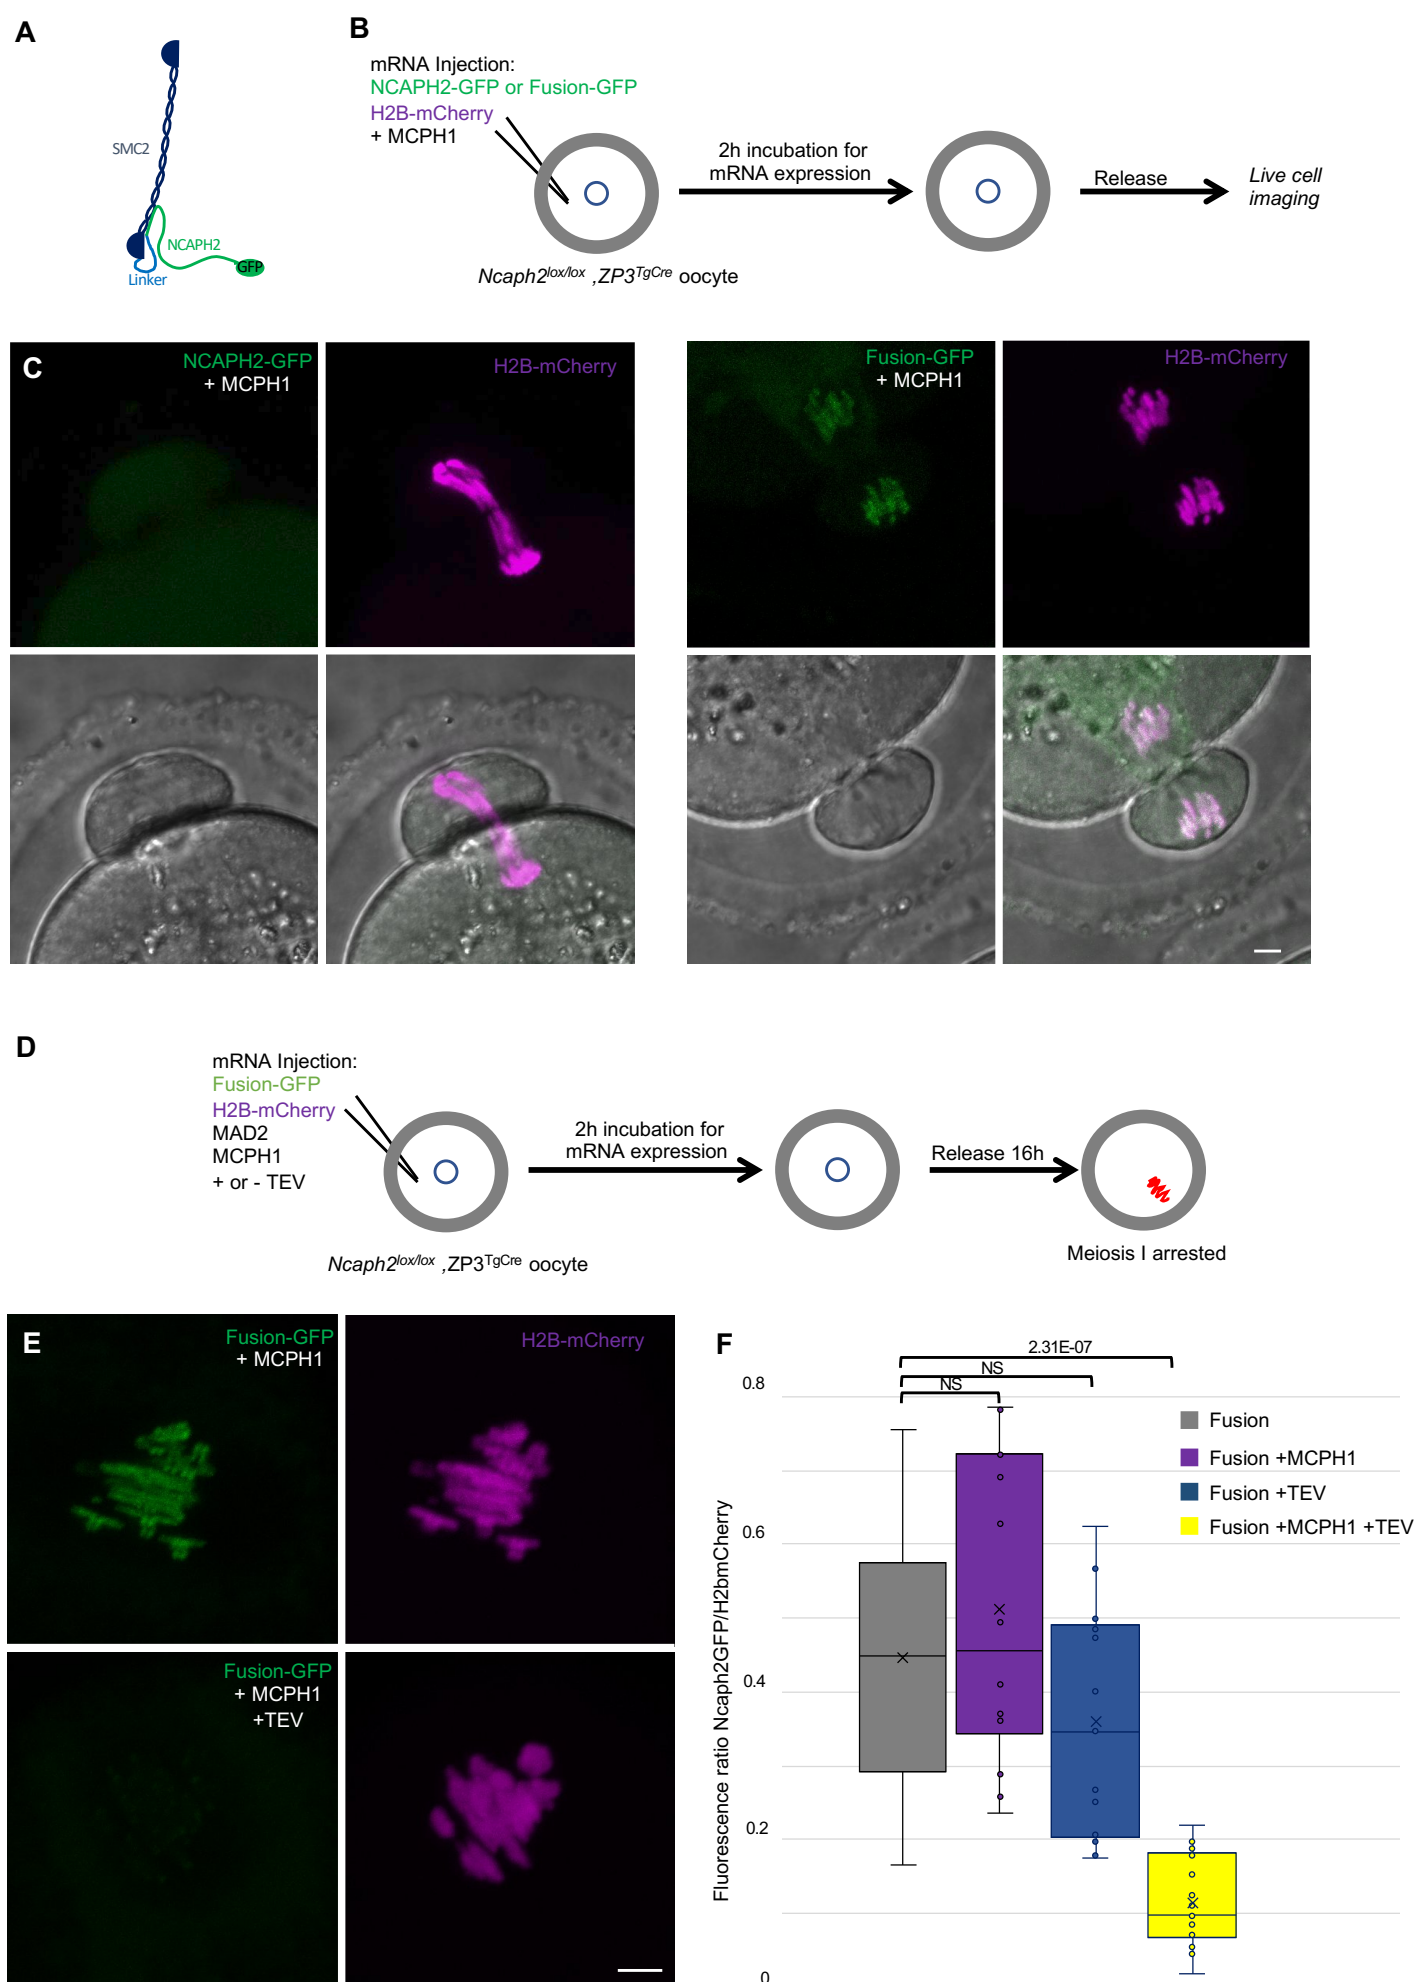

Figure 10

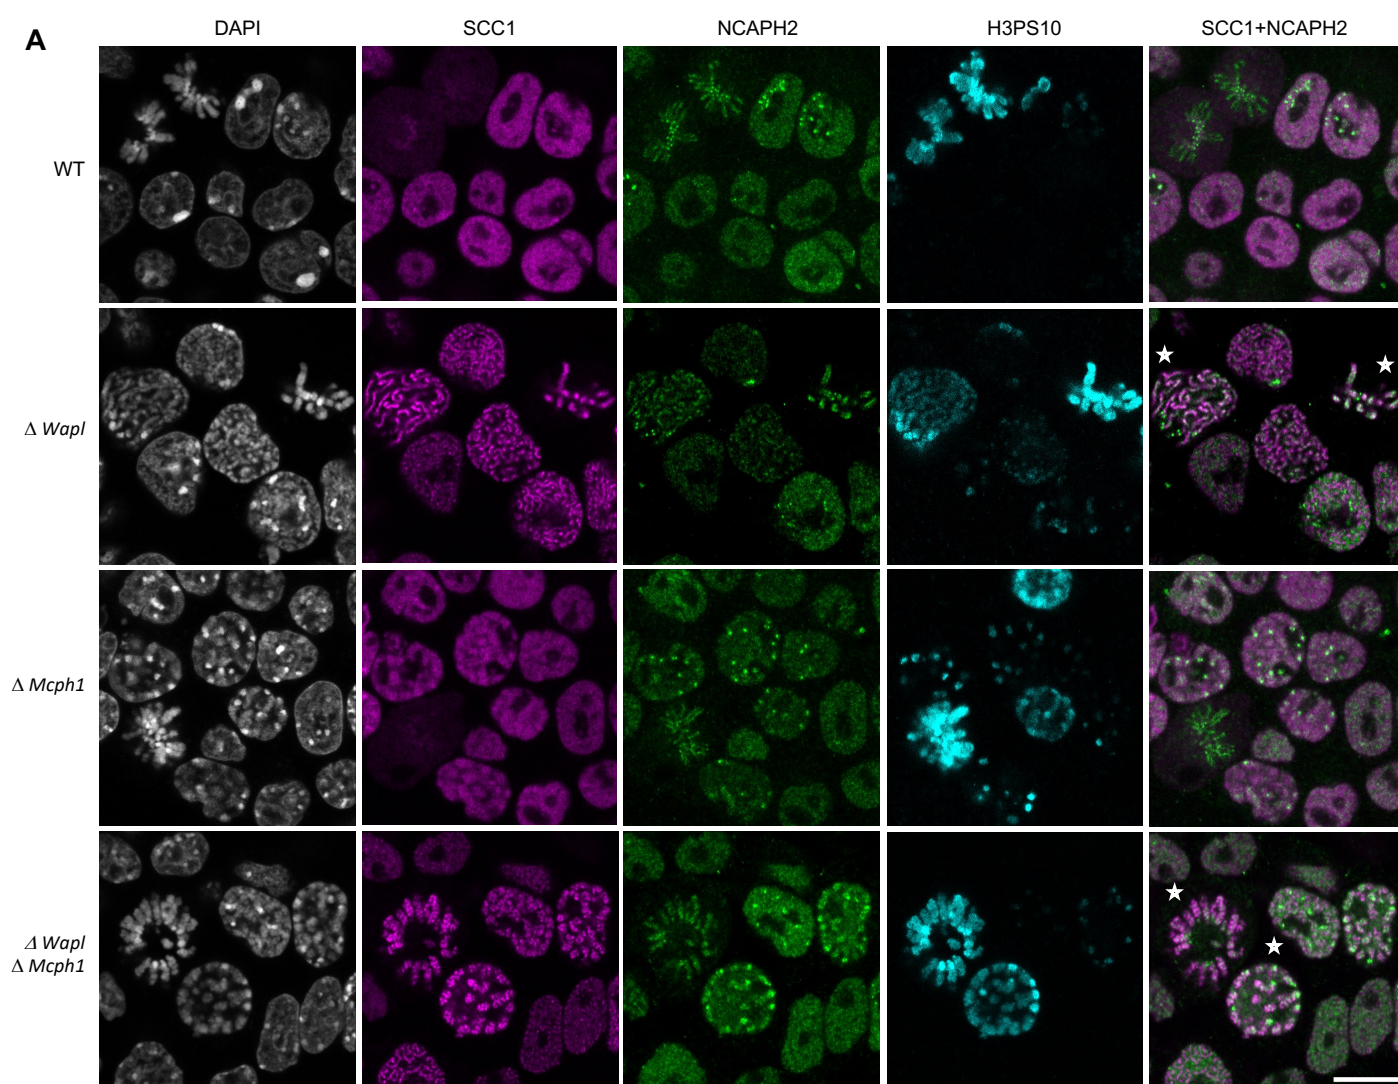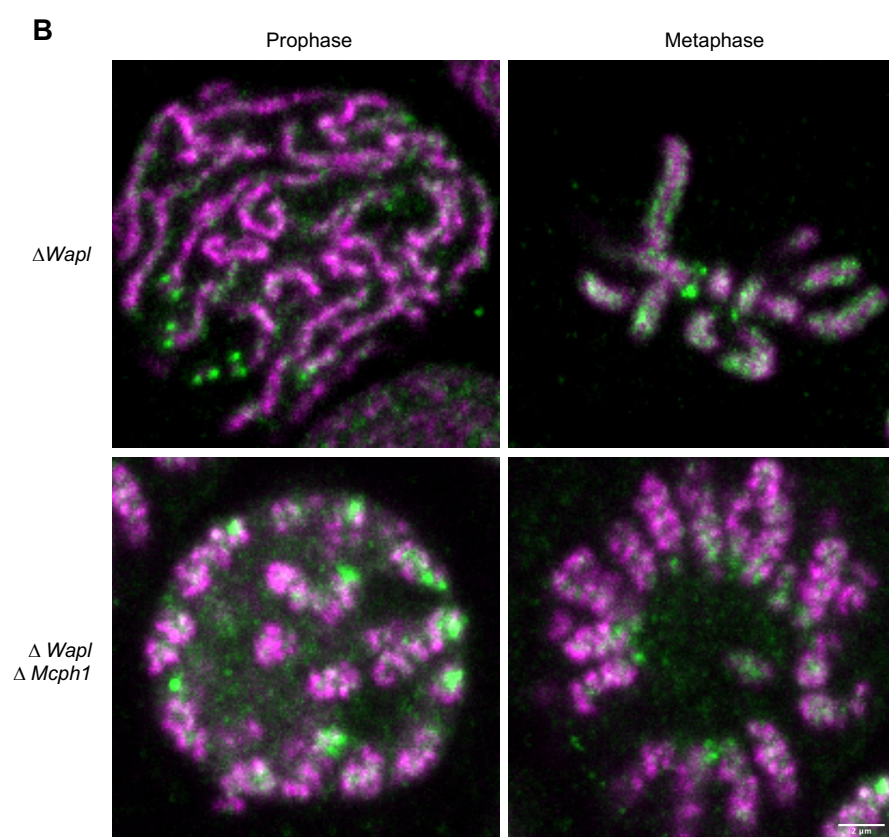

Figure 11

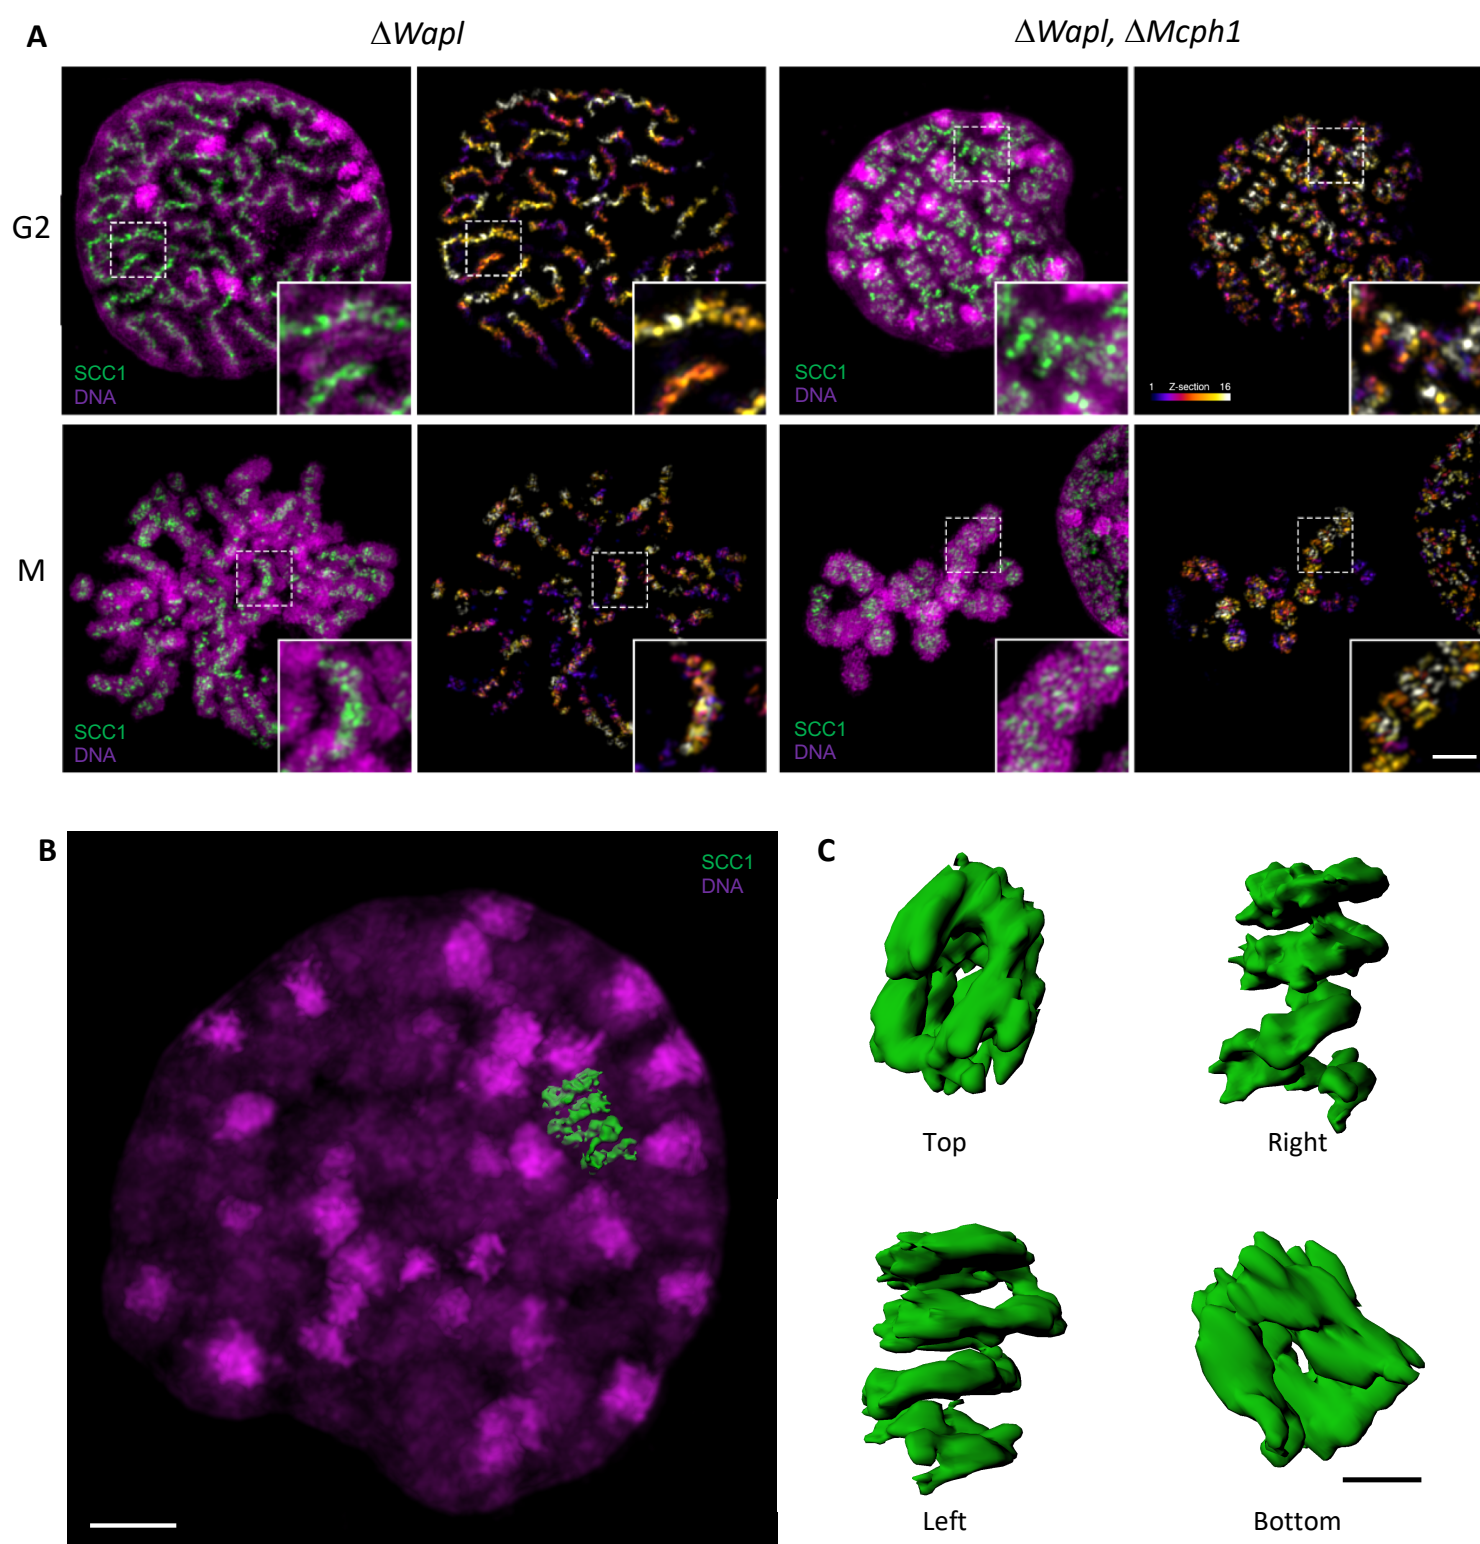

## Supplementary Figure 1

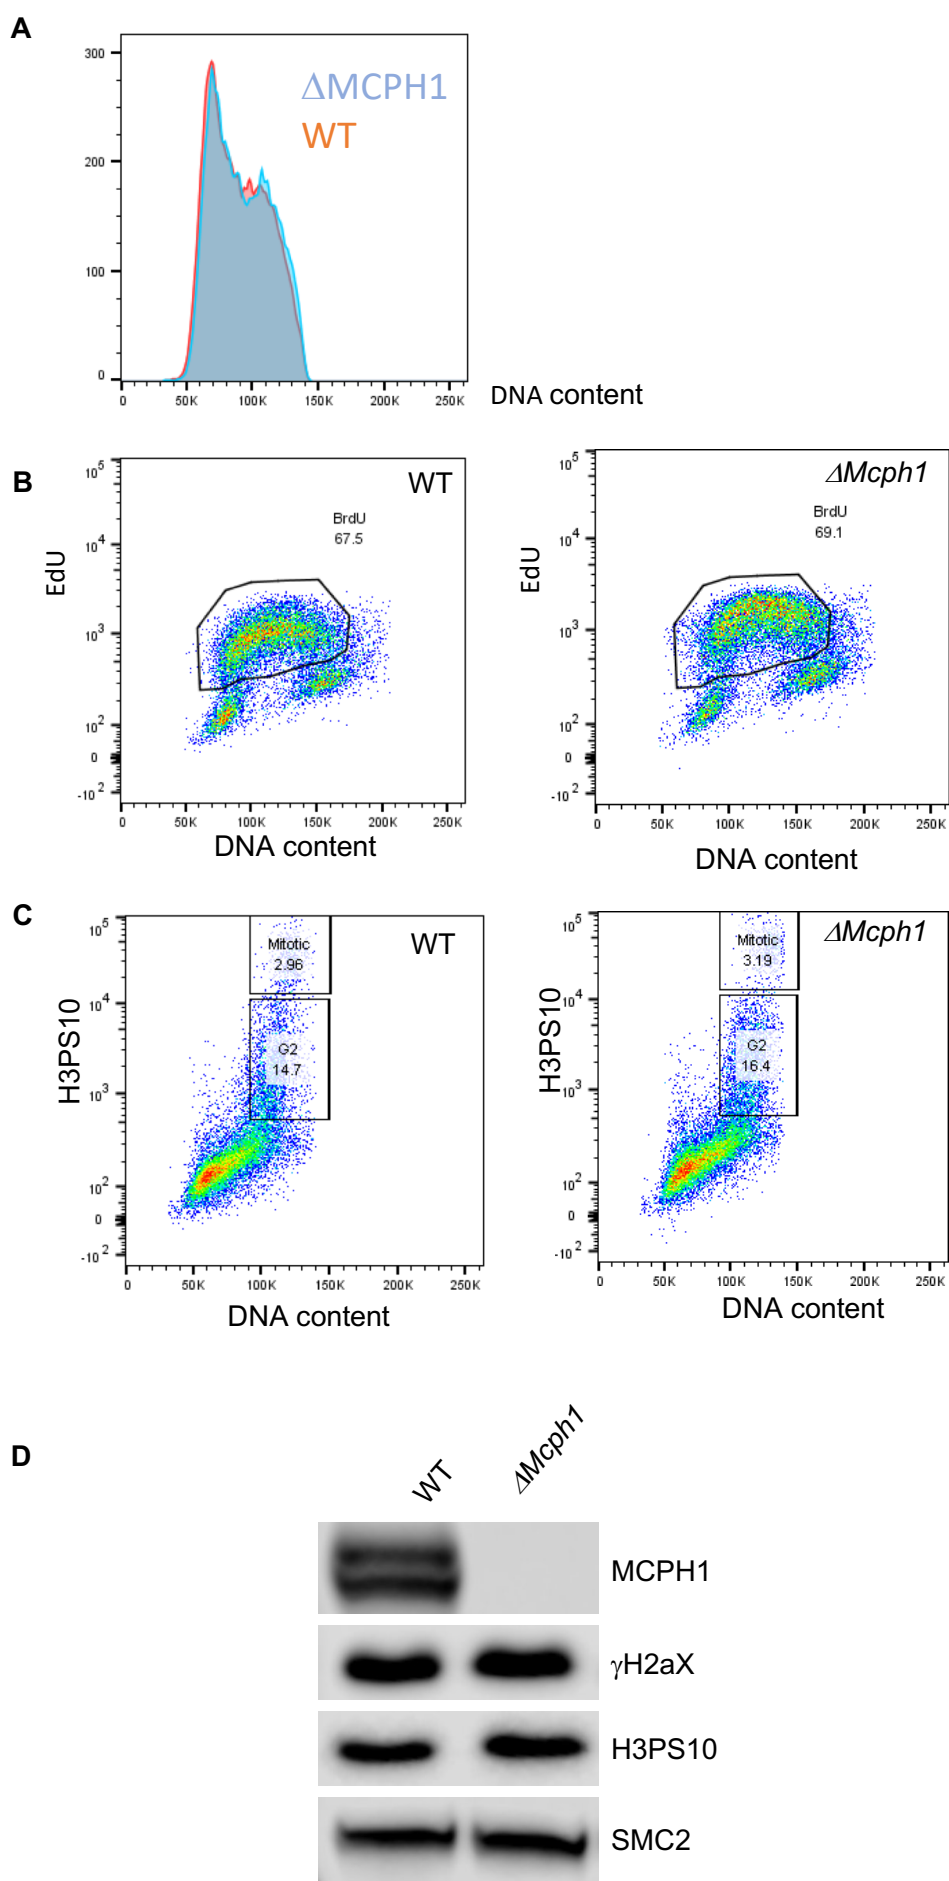

## Supplementary Figure 2

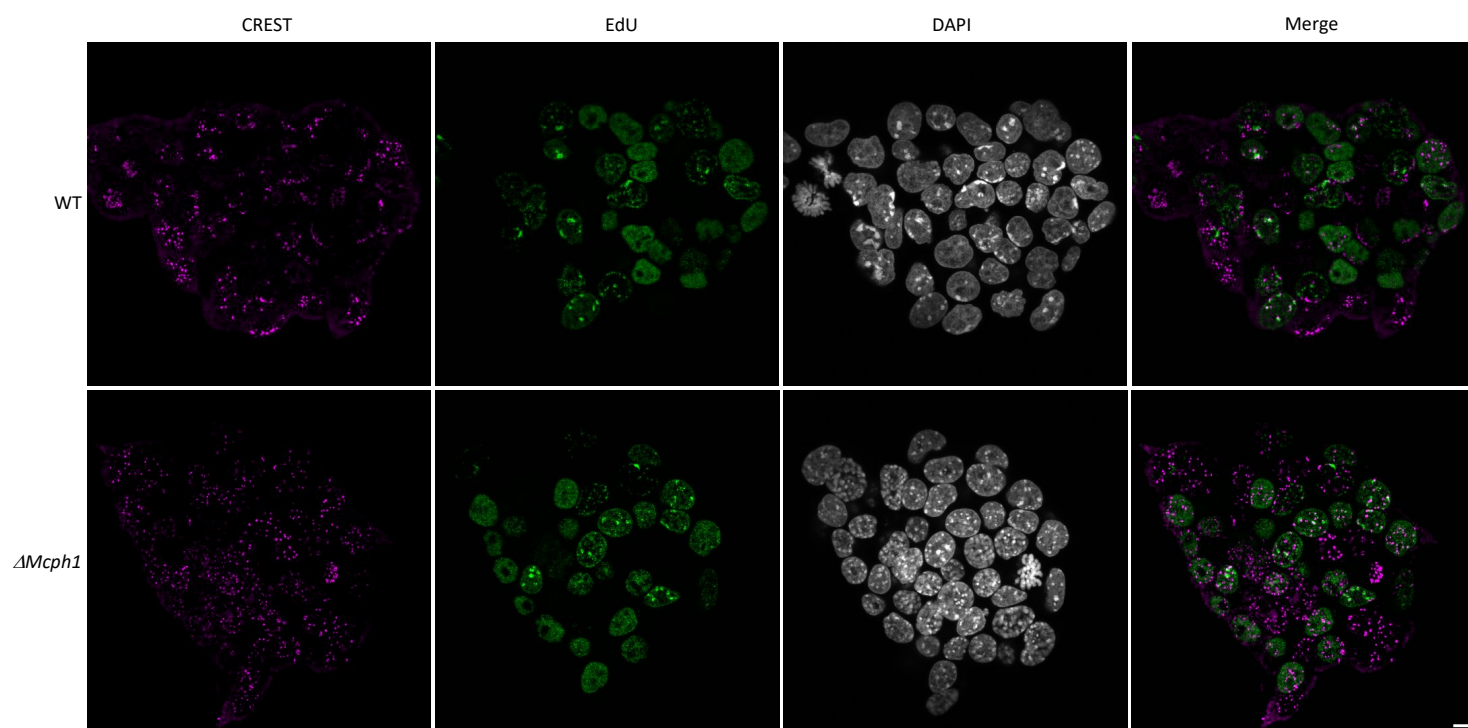

### Supplementary Figure 3

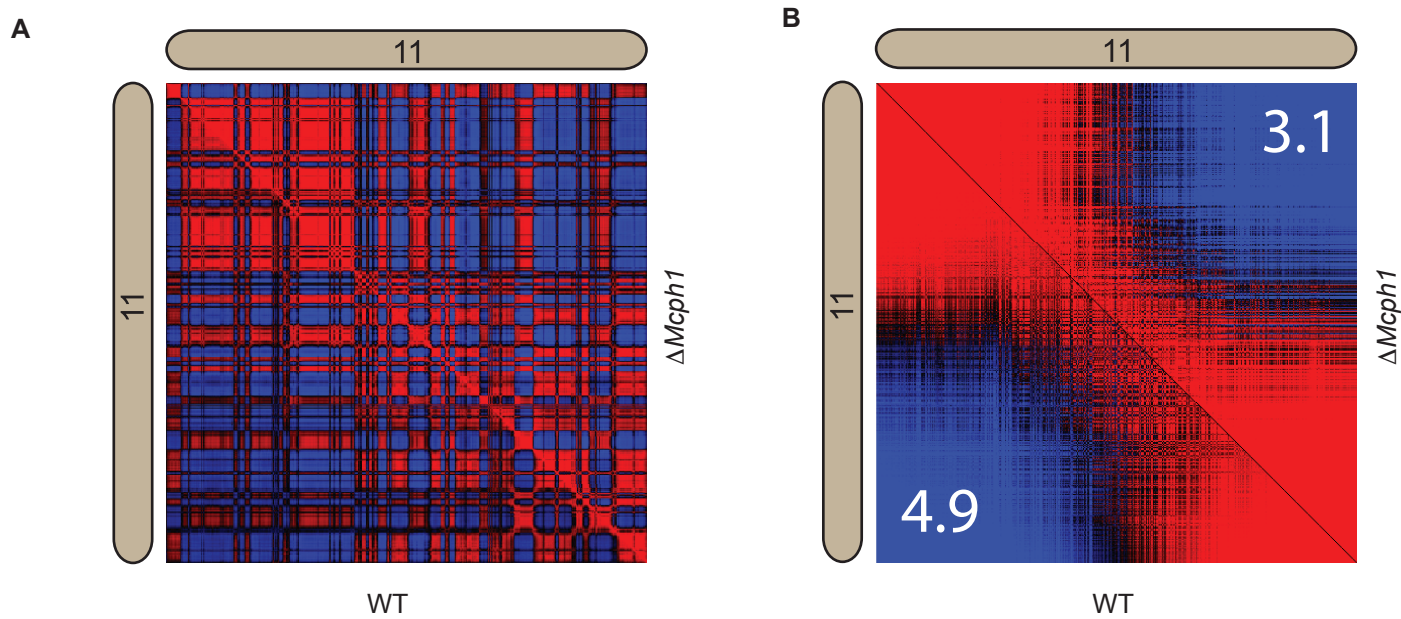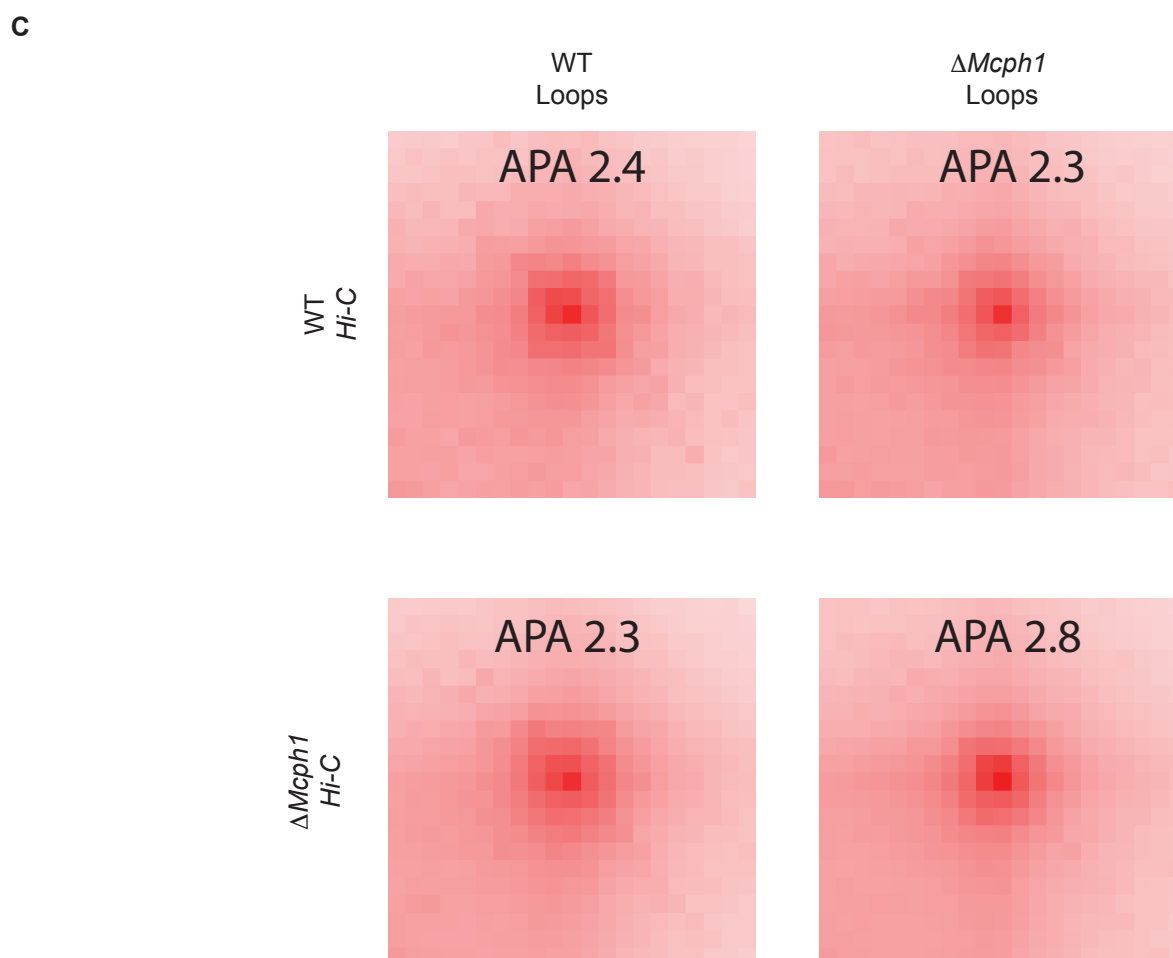





## Supplementary Figure 5

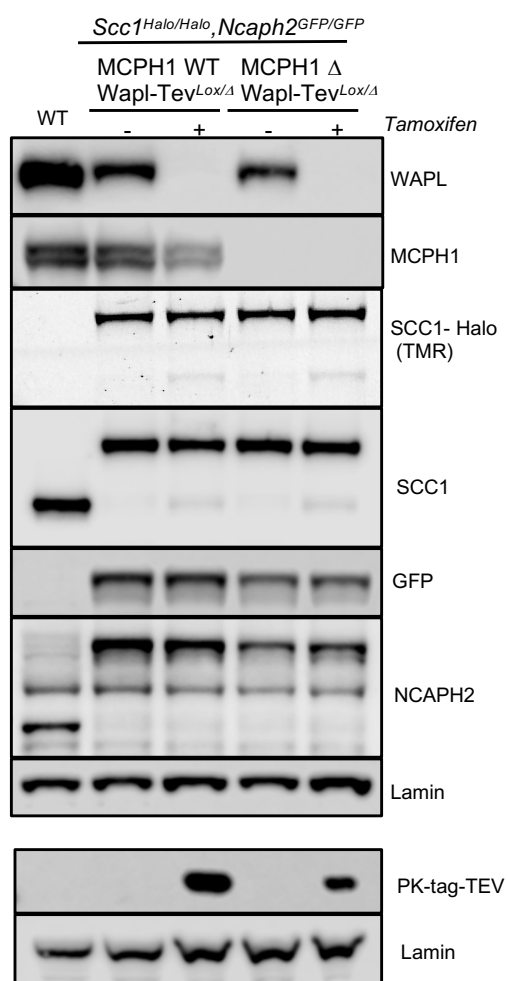

Source: https://www.biorxiv.org/content/10.1101/2021.07.20.453033v1.full.pdf
